# Supplementary material for: Evolution of the Parvalbumin Genes in Teleost Fishes after the Whole-Genome Duplication
Source: MDPI journal article supplement (doi:10.3390/fishes6040070), 2021-12-01
Supplement: s1 [file s1]

>Homo\_sapiens\_HUMCALCBP\_calmodulin

CGAUGGCACCAUCACAACAAAGGAACUUGGAACUGUCAUGAGGUCACUGGGUCAGAACCCACAGAAGCUGAAUUGCAGGAUAUGAU  
CAAUGAAGUGGAUGCUGAUGGUAAUGGCACCAUUGA----  
CUUCCCCGAAUUUUUGACUAUGAUGGCUAGAAAAAUGAAAGAUACAGAUAGUGAAGAAGAAAUCCGUGAGGCAUUCGAGUCUUUGA  
CAAGGAUGGCAAUGGUUAUAUCAGUGCAGCAGAACUACG-----UCACGUCAUGACAAA-----  
CUUAGGAGAAAAACUAACAGAUGAAGAAGUAGAUGAAUGAUCAGAGAAGCAGAUUUGAUGGAGACGGACAAGUCAACUAUGAA

>Homo\_sapiens\_HUMCAM\_calmodulin

UGAUGGCACUAUAACAACAAAGGAACUUGGGACUGUAAUGAGAUUCUUGGGCAGAAUCCACAGAAGCAGAGUACAGGACAUGAU  
UAAUGAAGUAGAUGCUGAUGGUAAUGGCACAAUUGA----  
CUUUCUGAAUUUCUGACAAUGAUGGCAAGAAAAAUGAAAGACACAGACAGUGAAGAAGAAAUAGAGAAGCAUUCGUGUGUUUGA  
CAAGGAUGGCAAUGGCUAUUUAGUGCUGCAGAACUUCG-----CCAUGUGAUGACAAA-----  
CCUUGGAGAGAAGUUAACAGAUGAAGAAGUUGAUGAAUGAUCAGGGAAGCAGAUUUGAUGGUGAUGGUCAAGUAAACUAUGAA

>Homo\_sapiens\_HUMCAMA\_CALM1\_calmodulin

AGAUGGCACUAUACACCACCAAGGAGUUGGGGACAGUGAUGAGAUCCUGGGACAGAACCCACUGAAGCAGAGCUGCAGGAUAUGAU  
CAAUGAGGUGGAUGCAGAUUGGGAACGGGACCAUUGA----  
CUUCCCGAGUUCUGACCAUGAUGGCCAGAAAGAUGAAGGACACAGACAGUGAGGAGGAGAUCCGAGAGGCGUUCGUGUCUUUGA  
CAAGGAUGGGAAUGGCUACAUCAGCGCCGAGAGCUGCG-----UCACGUAAUGACGAA-----  
CCUGGGGAGAGAAGCUGACCGAUGAGGAGGUGGAUGAGAUGAUCAGGGAGGCUGACAUCGAUGGAGAUGGCCAGGUCAAUAUGAA

>Petromyzon\_marinus\_PARV\_muscle\_like\_NC\_046071\_-LOC116958257\_

GGCCAGCTCCTCCGATGGAACACGGTTCGAT-----TTCGG-----  
-----CCGCCACGAGTCTCAA---CTACCGCAAGCTTCTC-----  
GAGTGTCTGAGCCGATCGGGAGAAGGAGGAGGACATTCGCAAAGTCTTCTGAAGCTGGACAAGGACAACAGCGGATACATCGAG  
TGGAACGAGCTTAG-----GTATG---TGACAGC-  
GGTCATCACTGGGGAGTTAAACAAGAAGTTGAGTGACCTGGAGACAGATCAGATCCTCCAGGTGATCGACAGCAACCAGGACGGCG  
AATCGACTTTGAC

>Campylomormyrus\_compressirostris\_KF860202\_parvalbumin\_isoform\_4b

UGACAUUACUAAAGCCCUGGAUGCCUGCAAAG-----  
-----CCGCUGACUCUUUCAA---CUACAAGACCUUCUUC-----  
GCGAAGGUUGGACUGAGCAGCAAGUCCGCCGACGAUGUCAAGAAGGCUUUCACCCAUCUCGAUCAGGACAAGAGUGGCUUCAUUGAG  
GAGGAUGAACUGAA-----GCUGUUCUGCAGAA-CUUCGCGCAGGUG-----  
CCAGAGCUCUGACUGACGACAGACAAAGGCCUUCUGAAAGCUGGAGACWCCGACGGUGAUGGCAAGAUCGGAGCUGAU

>Campylomormyrus\_compressirostris\_KF860197\_-parvalbumin\_isoform\_1c\_CDS

UGACAUCACUGCAGCACUGCAGGCCUGCCAAG-----  
-----CCGCUGACUCUUUCAG---CUACAAGGCCUUCUUC-----  
GCGAAGGUUGGACUGAGCAGCAAGUCCGCCGACGAUGUCAAGAAGGCUUUCGCCAUCAUUGAUCAGGACAAGAGUGGCUUCAUUGAG  
GAGGAUGAACUGAA-----GCUGUUCUGCAGAA-CUUCUUGCCAGUG-----  
CCAGAGCUCUGACUGACGCCGAGACAAAGACCUUCUGAAAGCUGGAGACUCCGACGGUGACGGCAAGAUAUGGUGUUGAU

>Campylomormyrus\_compressirostris\_KF860199\_-parvalbumin\_isoform\_1b\_CDS

UGACAUCACUGCAGCCCUGAAGGCCUGCCAAG-----  
-----CCGCUGACUCUUUCAA---CUACAAGACCUUCUUC-----  
GCGAAGGUUGGACUGAGCAGCAAGUCCGCCGACGAUGUCAAGAAGGCUUUCGUGUCAUUGAUCAGGACAAGAGUGGCUUCAUUGAG  
GAGGAUGAACUGAA-----GCUGUUCUGCAGAA-CUUCUUGCCAGUG-----  
CCAGAGCUCUGACUGACGCCGAGACAAAGGCCUUCUGAAAGCUGGAGACUCCGACGGUGACGGCAAGAUAUGGAGUUGAU

>Paramormyrops\_kingsleyae\_PARV\_beta\_NW\_019713787\_-LOC111856035\_CDS

CGACATCACTGCAGCCCTGGATGCCTGCAAAG-----  
-----CCGCTGACTCTTTCAG---CTACAAGGCCTTCTTC-----  
GCCAAGGTGGGACTGAGCAGCAAGTCCGCCGACGATGTCAAGAAGGCTTTGCCATCATCGATCAGGACAAGAGCGGCTTCATTGAG  
GAGGATGAACTGAA-----GCTGTTCTGCAGAA-CTTCAGCGCTAGTG-----  
CCAGAGCTCTGACTGACGCCGAGACGAAGACCTTTCTGAAAGCTGGAGACTCCGACGGTGACGGCAAGATCGGCGCTGAT  
>Paramormyrops\_kingsleyae\_PARV\_beta\_like\_NW\_019716143\_-\_LOC111842486\_CDS  
TGATATCACTGCAGCACTGCAGGCTTGCCAAG-----  
-----CTGCTGACAGTTTCAG---CCACAAGGCCTTCTTT-----  
GAAAAGGTGCGCCTGAGCGGCAAGTCTGCCGATGACGTCAAGAAGGCCTTTGCTGTCAATTGACCAGGACAAAAGTGGCTTCATTGAG  
GAGGATGAACTGAA-----ACTGTTCTACAGAA-CTTCTCTGCCGGTG-----  
CCAGAGTGCTCACTGACACGGAGACCAAGACCTTCCTTAAAGCTGGGGACACTGATGGCGACGGCAAGATTGGAATTGAT  
>Aristichthys\_nobilis\_FJ013047  
UGACAUCGCUGCAGCACUGGAGGCAUGCAAG-----  
-----AUGCUGACUCCUUC---CCACAAGGCCUUCUUC-----  
GCCAAGGUCGGUCUGAGCGCCAAGUCCAGCGAUGAUGUCAAGAAGGCUUUCGCAAUCAUCGAUCAGGACAAAAGUGGCUUCAUUGAG  
GAGGAUGAACUCAA-----ACUGUCCUGCAGAA-CUUCAAGGCUGGCG-----  
CCAGGGCAGACUGAUGCCGAGACCAAGAUUUUCCUGAAGGCUGGAGAUUCUGACGGUGACGGCAAGAUCGGAGUUGAU  
>Hypophthalmichthys\_molitrix\_FJ216938\_clone2  
UGACAUCGCUGCAGCACUGGAGGCAUGCAAG-----  
-----CUGCUGACUCCUUC---CCACAAGGCUUUCUUC-----  
GCCAAGGUCGGUCUGAGCGCCAAGUCCGGCGAUGAUGUCAAGAAGGCUUUCGCAAUCAUCGAUCAGGACAAGAGUGGCUUCAUUGAG  
GAGGAUGAACUCAA-----ACUGUCCUGCAGAA-CUUCAAGGCUGGCG-----  
CCAGGGCAGACUGAUGCCGAGACCAAGAUUUUCCUGAAGGCUGGAGAUUCUGACGGUGACGGCAAGAUCGGAGUUGAU  
>Carassius\_auratus\_JN190494  
UGACAUCACUGCAGCCCUGGAGGCAUGCAAG-----  
-----CUGCUGACUCCUUC---CCACAAGGCUUUCUUC-----  
ACCAAGGUCGGUCUGAGCGGCAAGUCUGAUGACGACGUGAAGAAGGCUUUCGCAAUCAUUGAUCAGGACAAGAGUGGCUUCAUUGAG  
GAGGAGGAACUCAA-----ACUGUCCUGCAGAA-CUUCAAGGCUGAUG-----  
CCAGGGCAGACUGACGCGGAGACCAAGACUUUCCUGAAGGCUGGAGAUUCUGAUGGCGACGGCAAGAUCGGAGUUGAU  
>Cyprinus\_carpio\_PARV04\_cluster\_3rd\_parv\_beta\_isolc\_LOC109097012\_cDNA  
TGACATCGCTGCAGCACTGGAGGCATGCAAG-----  
-----CTGCTGACTCCTTCAA---CCACAAGGCTTTCTTC-----  
GCCAAGGTGCGTCTGACCAGCAAGTCTGCTGATGATGTGAAGAAGGCTTTGCAATCATTGATCAGGACAAGAGTGGCTTCATTGAG  
GAGGATGAACTCAA-----ACTGTTCTGCAGAA-CTTCAAGGCTGATG-----  
CCAGGGCACTGACTGACGGCGAGACCAAGACTTTCCTGAAGGCTGGAGATTCTGACGGCGACGGCAAGATCGGAGTTGAT  
>Cyprinus\_carpio\_PARV08\_cluster\_7th\_parv\_betaline\_LOC109096998\_cDNA  
TGACATCACTGCAGCACTGGAGGCATGCAAG-----  
-----CTGCTGACTCCTTCAA---CCACAAGACTTTCTTC-----  
GCCAAGGTGCGTCTGACCAGCAAGTCTGCTGATGATGTGAAGAAGGCTTTGCAATCATTGATCAGGACAAGAGTGGCTTCATTGAG  
GAGGATGAACTGAA-----ACTGTTCTGCAGAA-CTTCAAGGCTGGGG-----  
CCAGGGCACTGACTGACGGCGAGACCAAGACTTTCCTGAAGGCTGGAGATTCTGATGGTGACGGCAAGATCGGAGTTGAT  
>Danio\_rerio\_NC\_007114\_-\_pvalb4\_CDS  
TGACATCTCTGCAGCACTGGAGGCATGCAAG-----  
-----CTGCTGACTCCTTCAA---CCACAAGTCTTTCTTC-----

GCAAAGGTCGGTCTGGCCAGCAAGTCCGCCGATGAGGTCAAGAAGGCCTTCGCAATCATTGATCAGGACAAGAGTGGCTTCATTGAG  
GAGGAGGAGCTCAA-----GCTGTTCTGCAGAA-CTTCAAGGCTGATG-----  
CCAGAGCACTGACTGACGGCGAGACCAAGACTTTCTGAAAGGCTGGAGACTCTGACGGAGACGGCAAGATCGGGATTGAT  
>Ictalurus\_furcatus\_GU587844\_-\_PRVB\_CDS  
UGACAUCACUGCAGCCUGGAUGCAUGCAAAG-----  
-----CCGACGGUCCUUCGA---CCACAAGAGCUUCUUC-----  
ACUAAGGUCGGUCUGACCGGCAAGUCUGCCGAUGAUGUCAAGAAGGCUUUCGCCAUCAUUGAUCAGGACAAGAGUGGCUUCAUUGAG  
GAGGAUGAACUGAA-----ACUGUUCUGCAGAA-CUUCAAAUCCAGCG-----  
CGAGGGCACUCACUGAUGACGAGACCAAGACUUUCCUCAAGGCUGGAGACACCGAUGGUGAUGGCAAGAUUGGAGUUGAU  
>Boreogadus\_saida\_FJ696956  
UGACAUUACUGCAGCCCUCAAGGCUUGCGAAG-----  
-----CUGCUGACUCCUUCUG---CUACAAGGACUUCUUC-----  
GCCAAGGUUGGUCUGUCUGCCAAGAGUGCUGAUGACAUCAAGAAGGCCUUUUUUCUGAUUGACCAGGACAAGAGCGGCUUCAUUGAG  
GAGGAUGAGCUGAA-----ACUGUUCUGCAGAA-CUUCUCUGCUGGCG-----  
CCAGGGCACUCACUGAUGCAGAGACAAAGGCCUUCUGAAAGCUGGAGACUCUGAUGGUGAUGGCAAGAUUGGAGUUGAU  
>Micropterus\_salmoides\_FJ696957  
UGACAUUACUGCAGCCCUUGCGGCUUGCACAG-----  
-----CUGCUGACUCCUUCAA---GCACAAGGCCUUCUUC-----  
GCCAAGGUUGGUCUGUCUGGCAAGAGUGCUGAUGACGUCAAGAAGGCCUUUGCUAUUAUUGACCAGGACAAGAGCGGCUUCAUUGAG  
GAGGAUGAGCUGAA-----ACUGUUCUGCAGAA-CUUCUCUGCUAGCG-----  
CCAGGGCACUCACUGAUGCAGAGACAAAGACCUUCCUGAAAGCUGGAGACUCUGAUGGUGAUGGCAAGAUUGGAGUUGAU  
>Carassius\_auratus\_JN190495  
UGACAUCACUGCAGCCUGCAGGCCUGCCAAG-----  
-----CUGCUGACUCCUUCAA---CUACAAGAGCUUCUUC-----  
GCCAAGGUUGGUCUGUCUGCCAAAACUCCUGAUGACAUCAAGAAGGCCUUUGCUGUCAUUGACCAGGACAAGAGCGGCUUCAUUGAG  
GAGGACGAGCUUAA-----ACUGUUCUGCAGAA-CUUCUCCGUGGCG-----  
CCAGGGCACUCACUGAUGCAGAGACAAAGGCCUUCUGAAAGCUGGAGACUCUGAUGGUGAUGGCAAGAUUGGAGUUGAU  
>Cyprinus\_carpio\_PARV17\_cluster\_3rd\_parv\_alpha\_LOC109049715\_cDNA  
TGACATCACTGCAGCCCTGCAGGCCTGCCAAG-----  
-----CTGCTGACTCCTTCGA---ATACAAGAGCTTCTTC-----  
GCCAAGGTTGGTCTGTCTGCCAAGACTCCTGATGACATCAAGAAGGCCTTTGCTGTCAATTGACCAGGACAAGAGCGGCTTCATTGAG  
GAGGATGAGCTTAA-----ACTGTTCTGCAGAA-CTTCTCTGCTGGCG-----  
CCAGGGCACTCACTGATGCAGAGACAAAGGCCTTCCTGAAAGCTGGAGACTCTGATGGTGATGGCAAGATTGGAGTTGAT  
>Cyprinus\_carpio\_PARV11\_cluster\_2nd\_parv\_alphalike\_LOC109100278\_cDNA  
TGACATCACTGCAGCCCTGCAGGGCTGCCAAG-----  
-----CTGCTGACTCCTTCGA---CTACAAGAGCTTCTTC-----  
GCCAAGGTTGGTCTGTCTGCCAAGACTCCTGATGACATCAAGAAGGCCTTTGCTGTCAATTGACCAAGACAAGAGCGGCTTCATTGAG  
GAGGATGAGCTGAA-----ACTGTTCTGCAGAA-CTTCTCTGCTGGCG-----  
CCAGGGCACTCACTGATGCAGAGACAAAGGCCTTCCTGAAAGCTGGAGACTCTGATGGTGATGGCAAGATTGGAGTTGAT  
>Danio\_rerio\_NC\_007123\_-\_pvalb3\_CDS  
TGACATCACTGCAGCCCTGCAGGCCTGCCAAG-----  
-----CTGCTGACTCCTTCGA---CTATAAGAGCTTCTTC-----  
GCCAAGGTTGGGCTGTCCGCCAAGACTCCTGATGACATCAAGAAGGCCTTTGCTGTCAATTGACCAGGACAAGAGCGGCTTCATTGAG

GAGGATGAGCTTAA-----ACTGTTCTCTGCAGAA-TTTCTCTGCTGGTG-----  
 CCAGGGCACTCACTGATGCAGAGACAAAGGCCTTCTGAAAGCTGGAGACTCTGATGGTGACGGCAAGATTGGAGTTGAT  
 >Hypophthalmichthys\_molitrix\_FJ216937\_clone1  
 UGACGUCACUGCAGCCUGCAGGCCUGCCAAG-----  
 -----CUGCUGACUCCUUCUAA---GUACAAGGACUUCUUC-----  
 GCCAAGGUUGGCCUUUCCGCCAAGAGUCCUGAUGACAUCAAGAAGGCCUUUGCUGUCAUUGACCAGGACAAGAGCGGCUUCAUUGAG  
 GAGGAUGAGCUGAA-----ACUGUUCUGCAGGA-CUUCUCUGCUGGUG-----  
 CCAGGGCACUCACUGAUGCAGAGACAAAGGCCUUCUUGAAAGCUGGAGACUCUGAUGGUGAUGGCAAGAUUGGAGUUGAU  
 >Epinephelus\_coioides\_HQ207649\_-\_parvalbumin\_1\_CDS  
 UGACAUCACUGCAGCCCUUGCGGCUUGCCAAG-----  
 -----CUGCCGACUCUUUCAA---GCACACAGACUUCUUU-----  
 GCCAAGGUCGGUCUUACUGGCAAGAGCGCCGAUGACAUCAAGAAGGCCUUUGCCGUGAUUGACCAGGACAAGAGUGGCUUCAUUGAG  
 GAGGAUGAGCUGAA-----GCUGUUCUGCAGAA-CUUCUCUCCUCUG-----  
 CCAGAGCUCUGACCGAUGCUGAGACCAAGGCCUUUCCUCAAGGCCGGUGACACUGAUGGUGACGGCAUGAUCGGAUGCGAA  
 >Fundulus\_grandis\_FJ696960  
 UGACAUUACUGCAGCCAUUGCAGCUUGCCAAG-----  
 -----CCGCUGACUCCUUCUAA---GCACAAGGAUUUCUUU-----  
 GCCAAGGUCGGCCUGGCUGCCAAGUCUGCUGAUGACAUCAAGAAGGCCUUCGCCGUGAUUGACCAGGACAAGAGUGGCUUCAUUGAG  
 GAGGAUGAGCUGAA-----GCUGUUCUGCAGAA-CUUCUCUGCCGGUG-----  
 CCAGAGCUCUGACCGAUGCUGAGACAAAGACCUUCCUGAAGGCUGGUGACUCUGAUGGUGACGGCAAGAUCCGGAGUUGAU  
 >Fundulus\_heteroclitus\_FJ696958  
 UGACAUUAGUGCAGCCAUUGCAGCUUGCCAAG-----  
 -----CCGCUGACUCCUUCUAA---GCACAAGGAUUUCUUU-----  
 GCCAAGGUCGGCCUGGCUGCCAAGUCUGCUGAUGACAUCAAGAAGGCCUUCGCCGUGAUUGACCAGGACAAGAGUGGCUUCAUUGAG  
 GAGGAUGAGCUGAA-----GCUGUUCUGCAGAA-CUUCUCUGCCGGUG-----  
 CCAGAGCUCUGACCGAUGCCGAGACAAAGACCUUCCUGAAGGCUGGUGACUCUGAUGGUGACGGCAAGAUCCGGAGUUGAU  
 >Fundulus\_similis\_FJ696959  
 UGACAUUAGUGCAGCCAUUGCAGCUUGCAAAG-----  
 -----CCGCUGACUCCUUCUAA---GCACAAGGAGUUCUUU-----  
 GCCAAGGUCGGCCUGGCUGCCAAGUCUGCUGAUGACAUCAAGAAGGCCUUCGCCGUGAUUGACCAGGACAAGAGUGGCUUCAUUGAG  
 GAGGAAGAGCUGAA-----GCUGUUCUGCAGAA-CUUCUCUGCCGGUG-----  
 CAAGAGCUCUGACCGAUGCCGAGACAAAGACCUUCCUGAAGGCUGGUGACUCUGACGGUGACGGCAAGAUUGGAGUUGAU  
 >Rivulus\_marmoratus\_AY682950\_-\_parvalbumin\_2\_CDS  
 UGACAUCACUGCAGCCUCGCAGCCUGCCAAG-----  
 -----CUGCUGACUCUUUCAA---GCACAAGGAGUUCUUC-----  
 GCCAAGGUCGGCCUGGCCGGAAGUCUGCCGAUGACAUCAAGAAGGCCUUUGCUGUCAUUGACCAGGACAAGAGCGGCUUCAUUGAG  
 GAGGAUGAGCUGAA-----ACUGUUCUGCAGAA-CUUCUCCGCCAGCG-----  
 CCAGAGCUCUGACCGACGCUGAGACAAAGACCUUCCUGAAGGCCGGUGACUCUGAUGGUGACGGCAAGAUCCGGAGUUGAU  
 >Lates\_calcarifer\_AY688372\_-\_parvalbumin\_beta-1\_CDS  
 UGACAUCACUGCAGCCCUUGCAGCUUGCCAAG-----  
 -----CUGCCGACUCUUUCAA---GCACAAGGACUUCUUU-----  
 GUUAAGGUUGGCCUGGCUGGUAAGUCUGAUGAGCUGACAAGAAGGCCUUUGCUGUCAUUGACCAGGACAAGAGUGGCUUCAUUGAG  
 GAGGAUGAGCUGAA-----GCUGUUCUGCAGAA-CUUCUCUGCCAGUG-----  
 CCAGAGCUCUGACCGACGCUGAGACUAAGGAGUUUCUCAAAGCCGGUGACUCUGAUGGUGACGGCAAGAUCCGGAGUUGAU

>NeoBri\_NW\_006272077\_extraction\_-\_LOC102785235\_CDS

TGACATCACTGCAGCCCTTGCAAGT-----  
-----CTGCCGACTCCTTCAA---GCACAAGGACTTCTTT-----  
GCTAAGGTCGGCCTGGCAGCCAAGTCCGCCGATGAGATCAAGAAGGCCTTTGCCATCATTGACCAGGACAAGAGTGGCTTCATTGAG  
GAGGATGAGCTGAA-----GCTGTTCTGCAGAA-CTTCTCTGCCAGTG-----  
CCAGAGCTCTGACTGATGCTGAGACAAAGGCATTTCTTCAGGCCGGTGAAGTCTGATGGTGATGGCAAGATCGGAGTTGAT

>Tilapia\_NC\_031973\_02\_LOC100707505\_parvalbumin\_beta

TGACATCACTGCAGCCCTTGCAAGT-----  
-----CTGCCGACTCCTTCAA---GCACAAGGACTTCTTT-----  
GCTAAGGTCGGCCTGGCAGGCAAGTCCGCCGATGACATCAAGAAGGCCTTTGCCGTCATTGACCAGGACAAGAGTGGCTTCATTGAG  
GAGGATGAGCTGAA-----GCTGTTCTGCAGAA-CTTCTCTGCCAGTG-----  
CCAGAGCTCTGACTGATGCTGAGACAAAGACATTTCTTAAGGCCGGTGAAGTCTGATGGCGATGGCAAGATCGGAGTTGAT

>Sparus\_aurata\_NC\_044206\_2nd\_LOC115570671

TGACATCACTGCAGCCCTCGCGGCTTGCAAGT-----  
-----CTGCCGACTCTTTCAA---GCACAAGGATTTCTTC-----  
GCCAAGGTCGGCCTGGCTGGCAAGTCCGCAGATGACATCAAGAAGGCCTTCGCTGTCAATTGACCAGGACAAGAGTGGCTTCATTGAG  
GAGGATGAGCTGAA-----GCTGTTCTGCAGAA-CTTCTCTGCCTCTG-----  
CCAGAGCTCTGACCGACGGTGAGACCAAGACGTTCTCAAGGCCGGTGAAGTCTGATGGTGACGGCAAGATCGGAGTTGAT

>tuna\_BKCK01000054\_parv\_cluster\_2nd\_cDNA

TGACATCACTGCAGCCCTTGCTGCATGCCAAGT-----  
-----CTGCCGACTCTTTCAA---GTACAAAGACTTCTTC-----  
ACTAAGGTCGGCCTGGCTGCCAAGACCCCTGAGGACATCAAGAAGGCCTTTGCCGTCATTGACCAGGACAAGAGTGGCTTCATTGAG  
GAGGATGAGCTGAA-----GCTGTTCTGCAGAA-CTTCTCCGCCGGTG-----  
CCAGAGCTCTGACCGATGCTGAGACCAAGGCATTTCTCATGGCCGGTGAAGTCTGATGGCGACGGCAAGATCGGAATTGAT

>Paralichthys\_olivaceus\_AB375266\_-\_Par\_o\_1\_CDS

UGACAUCACUGCAGCCCUUGCUGAAUGCCAAGT-----  
-----CUGCCGGCUCUUUCA---CCACAAGAAAUUCUUC-----  
GCAAAGGUCGGCCUGUCUGCCAAGUCUCCUGCUGACAUCAAGGCAGCCUUCGCAGUCAUUGACCAGGACAAGAGCGACUUUAUUGAG  
GAGGAUGAGCUGAA-----GCUGUUCUGCAGAA-CUUCUCCGCCAGUG-----  
CCAGAGCUCUGACCGACGCUGAGACAAAGGAAUUCUCAAGGCCGGUGACUCUGAUGGUGAUGGCAAGAUUGGAGUUGAU

>Lutjanus\_argentimaculatus\_EF591789\_-\_parvalbumin\_CDS

UGACAUCACUGCAGCCCUUGCGGCUUGCCAAGT-----  
-----CUGCCGACUCUUUCA---GCACACAGACUUCUUU-----  
GCCAAGGUCGGUCUUACUGGCAAGAGCGCCGAUGACAUAAGAAGGCCUUGCCGUGAUUGACCAGGACAAGAGCGGUUCAUUGAG  
GAGGAUGAGCUCAA-----GCUGUUCUGCAGAA-CUUCAAGGGUGGCG-----  
CACGUGCUCUGACGGACGACGAGACCAAGACUUCCUCAAGGCCGGUGACACCGAUGGUGACGGCAAGAUUGGCGCUGAU

>Chaenodraco\_wilsoni\_FJ696954

UGACAUCACUGCAGCCCUUGCAGCUUGCAAAGT-----  
-----CUGCUGAGUCUUUCA---GCACAAGGAAUUCUUC-----  
GCUAAGGUCGGCCUGUCCGCCAAGAGCGCUGAUGACAUAAGAAAGCUUUCGGGGUCAUUGACCAGGACCAGAGUGGCUUCAUUGAG  
GAGGAGGAGCUGAA-----GCUGUUCUGCAGAA-CUUCUCUGCCGGUG-----  
CCAGAGCUCUGACUGAUGCUGAGACCAAGGCUUCCUGAAGGCCGGUGACAUUGAUGGUGAUGGCAUGAUUGGAAUCGAU

>Gobionotothen\_gibberifrons\_FJ696944

UGACAUCACUGCAGCCCUCGCAGCUUGCAAAG-----  
 -----CUGCUGAGUCUUUCAA---GCACAAGGAAUUCUUC-----  
 GCUAAGGUCGGCCUGUCCGCCAAGAGCGCUGAUGACAUCAAGAAAGCUUUCGGGGUCAUUGACCAGGACCAGAGUGGCUUCAUUGAG  
 GAGGAGGAGCUUAA-----GCUGUUCUGCAGAA-CUUCUCUGCCGGUG-----  
 CCAGGGCUCUGACUGACGGUGAGACCAAGGCUUUCUGAAGGCUGGUGACAUCGAUGGUGAUGGCAUGAUUGGAAUCGAU  
 >Patagonotothen\_ramsayi\_FJ696946  
 UGACAUCACUGCAGCCCUCGCAGCUUGCACAG-----  
 -----CUGCUGAGUCUUUCAA---GCACAAGGAAUUCUUC-----  
 GCUAAGGUCGGCCUGUCCGCCAAGAGCGCUGAUGACAUCAAGAAAGCUUUCGGGGUCAUUGACCAGGACCAGAGUGGCUUCAUUGAG  
 GAGGAGGAGCUUAA-----GCUGUUCUGCAGAA-CUUCUCUGCCGGUG-----  
 CCAGAGCACUGACCGUAGGUGAGACCAAGGCUUUCUGAAGGCCGGUGACAUCGAUGGUGAUGGCAUGAUUGGAAUCGAU  
 >Trematomus\_hansonii\_FJ696951  
 UGACAUCACUGCAGCCCUCGCAGCAUGCACAG-----  
 -----CUGCUGAGUCUUUCAA---ACACAAGGAAUUCUUC-----  
 GCUAAGGUCGGCCUGUCCGCCAAGAGCGCUGAUGACAUCAAGAAAGCUUUCUGGUGUCAUUGACCAGGACCAGAGUGGCUUCAUUGAG  
 GAGGAGGAGCUGAA-----GCUGUUCUGCAGAA-CUUCGCUGCCGGUG-----  
 CCAGAGCUCUGACUGUUGCUGAGACCAAGGCUUUCUGAAGGCCGGUGACAUCGAUGGUGAUGGCAUGAUCGGAAUCGAU  
 >Lepisosteus\_oculatus\_PARV\_2like\_NC\_023191\_-\_LOC102692097  
 AGACGTCGCTGCAGCCCTGCAGGCTTGCCAAG-----  
 -----CCGCTGACTCTTTCAA---CTACAAGACCTTCTTC-----  
 GCCAAGGTTCGGCCTGGCTGGCAGGTCCGCCGAAGACGTCAAGAAGGCCTTCGCTGTCCTGGACCAGGACAAGAGCGGCTTCATTGAG  
 GAGGACGAGCTGAA-----GCTGTTCTGCAGAA-CTTCAAGGCCGACG-----  
 CCAGAGTCCTGACCGACGCCGAGACCAAGGCCTTCCTGGCCGCCGGGACTCC-----  
 >Lepisosteus\_oculatus\_PARV\_beta\_NC\_023191\_-\_LOC102697246  
 AGACATCGCTGCAGCCCTGCAGGCATGCCAAG-----  
 -----CCGCTGACTCTTTCAA---CTACAAGACCTTCTTC-----  
 GCCAAGGTTCGGCCTGGCTGGCAGGTCCGCCGACGACGTCAAGAAGGCCTTCGCTGTCCTGGACCAGGACAAGAGCGGCTTCATTGAG  
 GAGGACGAGCTGAA-----GCTGTTCTGCAGAA-CTTCAAGGCCGACG-----  
 CCAGAGTCCTGACCGACGCCGAGACCAAGGCCTTCCTGGCCGCCGGGACTCCGACGGTGACGGCAAGATCGGAGTTGAT  
 >Acipenser\_ruthenus\_PARV\_NC\_048335\_4th\_LOC117418394  
 AGATATTACTGCAGCACTGCAGGCATGCCAAG-----  
 -----CCGCTGACTCCTTCAA---CTACAAGGTCTTCTTT-----  
 GCCAACGTCGGCCTGAGCGGCAAGTCTGCTGATGACGTGAAGAAAGCCTTCGAAATCCTGGATCAGGACCGGAGCGGTTTCATTGAG  
 GAGGATGAATTGAA-----GCTGTTTCTGCAGAA-CTTCGCCGCTGGAG-----  
 CCAGAGTTCTTACTGACGCTGAGACCAAGGCCTTCCTGAACGCTGGTGACTCCGACGGTGACGGCAAAATCGGAGTTGAT  
 >Acipenser\_ruthenus\_PARV\_NC\_048337\_4th\_LOC117431614  
 AGACATTACTGCCGCCCTGCAGGCATGCCAAG-----  
 -----CCGCTGACTCATTCAA---CTACAAGGACTTCTTT-----  
 GCCAAGGTTCGGTCTGAGCGGCAAGTCTGCTGATGACGTGAAGAAAGCCTTTGCAATCCTGGATCAGGACATGAGCGGCTTCATTGAG  
 GAGGATGAATTGAA-----GCTGTTTCTGCAGAA-CTTCGCCGCTAGCG-----  
 CCAGAGTTCTGACTGACGCTGAGACCAAGGCCTTCCTGAACGCTGGCGACTCAGACGGTGACGGCAAAATCGGAATTGAT  
 >Acipenser\_ruthenus\_PARV\_NC\_048335\_3rd\_LOC117973481  
 AAACGTCAGTGCAGCTCTGCAGGAGTGTCAAG-----  
 -----CCGCTGACTCCTTCAA---CTACAAGGCCTTCTTT-----

GCTAAGGTCGGTCTGAGCGCAAGTCTGCTGATGACGTGAAGAAAGCCTTCGAAATCCTGGATCAGGACAGGAGCGGTTTCATTGAG  
 GAGGATGAACTGAA-----ACTGTTTCTGCAGAATCTTCGCTGCAGGCG-----  
 CCAGAGTTCTTACTGACGCTGAGACCAAGGCATTCTTCCGCTGGTGACTCCGACGGTGACGGCAAAATCGGAGTTGAT  
 >Acipenser\_ruthenus\_PARV\_alpha\_like\_NC\_048337\_3rd\_LOC117431642  
 AGACATCACTGCAGCCTTGCAGGCGTGCAAG-----  
 -----CCGCTGACTCATTCAA---CTACAAGGCCTTCTTT-----  
 GCCAAGGTTGGTCTGAGCGCAAGTCTGGTGATGACGTGAAGAAAGCCTTTGCAATCCTAGATCAGGACATGAGCGGCTTCATTGAG  
 GAGGATGAATTGAA-----ACTGTTTCTGCAGAA-CTTCGCTGCAGGCG-----  
 CCAGAGCTCTGACTGATAAAGAGACGAAGGACTTCCTTCCGCTGGTGACTCCGACGGTGACGGCAAAATCGGAATTGAT  
 >Polypterus\_senegalus\_PARV\_2like\_NC\_053166\_-\_LOC120542990  
 AGACATTAAGGCAGCTCTGGAAGCTTGCAAAG-----  
 -----CTCCCGACTCTTTCAA---CTACAAGAACTTCTTC-----  
 GCCAAGGTTGGTCTGACCGGCAGGTCTGCCGATGACGTGAAGAAGGCCTTCGCCGTCCTGGATCAGGACAAGAGCGGCTTCATTGAG  
 GAAGATGAGCTCAA-----GCTGTTCTGCAGAA-CTTCTGCTCCGGTG-----  
 CCAGAGCTCTGACTGATGCAGAGACCAAAGCCTTCCTCGCTGCCGGCGACTCTGATGGTGACGGCAAAATCGGAGTTGAT  
 >Polypterus\_senegalus\_PARV\_alpha\_like\_NC\_053166\_-\_LOC120542675  
 CGACATTAAAGCTGCTCTGCAGGCATGCCAAG-----  
 -----CACCTGACTCTTTCAA---CTACAAGACCTTCTTC-----  
 GCCAAGGTTGGTCTGACCGGAAGGTCTGCAGAAGACGTGAAGAAAGCCTTCGCTGTCCTGGATCAGGACAAGAGCGGCTTCATTGAG  
 GAAGATGAGCTGAA-----ACTGTTCTGCAGAA-CTTCCAGTCCGGTG-----  
 CAAGAGCTCTGACCGACAAGGAGACCAAGGCTTTCATGACCGCTGGGGATTCTGATGGTGACGGCAAAATCGGAGTTGAC  
 >Paramormyrops\_kingsleyae\_PARV\_2like\_NW\_019713787\_-\_LOC111856036\_CDS  
 TGACATCACTGCAGCCATGAAGGACTGCCAAG-----  
 -----CCGCTGACTCCTTCAA---CTACAAGAGCTTCTTT-----  
 GCCAAGGTTGGACTGAGCAGCAAGTCCGCTGATGATGTCAAGAAGGCTTTGCCATCATTGACCAGGACAACAGCGGCTTCATTGAG  
 GAGGATGAACTGAA-----GCTGTTCTGCAGAA-TTCTCTGCTGGCG-----  
 CTCGTGTCCTGACAGACGGTGAGACGAAGACCTTCCTGGCCGCGAGGAGACAGTGACGGTGATGGCAAAATTGGTGTTGAC  
 >Xenopus\_laevis\_MGC\_NC\_030740\_-\_MGC53003\_CDS  
 TGACATCTCTGCTCTGAAGAACTGCCAGG-----  
 -----CTGCTGACTCCTTCAA---CTACAAAACCTTCTTT-----  
 GCCCAGTCTGGTCTGAGCAGCAAGTCCGCTGATGATGTGAGAAAGTCTTTGCCATCTTCGACCAGGACAAGAGCGGCTTCATTGAG  
 GAAGATGAACTGAA-----GCTGTTCTCCAGAA-CTTCAACTCAGGTG-----  
 CCAGGGCATTGACCGATGCTGAGACCAAGACCTTCCTGGCAGCTGGAGACTCTGATGGTGATGGCAAAATTGGAGTTGAT  
 >Xenopus\_laevis\_MGC\_NC\_030741\_-\_MGC80184\_CDS  
 TGACATCTCTGCTGCTCTGCAGGCTTGCCAAG-----  
 -----CTGCTGACTCCTTCAA---CTACAAAGCCTTCTTT-----  
 GCCAAGTCTGGTCTGAGCAGCAAGTCCGAGATGATGTGAAGAAAGTCTTTGCCATCATCGACCAGGACAAGAGCGGCTTCATTGAG  
 GAAGATGAACTGAA-----GCTGTTCTCCAGAA-CTTCAGCTCCAGTG-----  
 CCAGAGCTTTAACTGATGCTGAGACCAAGGCTTTCCTGTCTGCTGGAGACTCCGATGGTGATGGCAAAATTGGAGTTGAT  
 >Xenopus\_laevis\_PARV\_beta\_like\_NC\_030741\_-\_LOC108703149\_CDS  
 TGACATCTCTGCTGCTCTGCAGAACTGCCAGG-----  
 -----CTGCTGACTCCTTCAA---TTACAAAAGTTTCTTT-----  
 GCCAAGTCTGGTCTGAGCAGCAAGTCCGAGATGATGTGAAGAAAGTCTTTGCCATCATCGACCAGGACAAGAGCGGCTTCATTGAG

GAAGATGAACTGAA-----GCTGTTCTCCAGAA-CTTCAGCTCCGGTG-----  
CCAGAGCTTTATCTGATGCTGAGACCAAGGCTTTCCTGTCTGCTGGAGACTCTGATGGTGATGGCAAAATTGGAGTTGAT  
>Xenopus\_laevis\_PARV\_beta\_like\_NC\_030740\_-\_LOC108701584\_CDS  
TGACATCTCAGCTGCTCTGCAGGCTTGCCAAG-----  
-----CTGCTGACTCCTTCAA---CTACAAAGCCTTCTTT-----  
GCCAAGTCTGGTCTGAGCGGCAAGTCCGCAGATGATGTGAAGAAAGTCTTTGCCATCCTTGACCAGGACAAGAGCGGCTTCATTGAG  
GAAGATGAACTGAA-----ACTCTTCTCCAGAA-CTTCAACTCTGGTG-----  
CCAGGGCCTTAAGTATGCTGAGACCAAGGCTTTCCTGAAAGCTGGTGACTCCGATGGTGATGGCAAAATTGGAGTTGAT  
>Xenopus\_laevis\_MGC\_NC\_030741\_-\_MGC53763\_CDS  
TGACATCAACTCTGCTCTGCAGAACTGCCAAG-----  
-----CTGCTGACTCCTTCAA---CTTCAAACTTTCTTT-----  
GCCCAGTCTGGTCTGAGCAGCAAGTCCGCAGATGATGTGAGAAAAGTCTTTGCCATCATCGACCAGGACCAGAGCGGCTTCGTTGAG  
GAAGATGAACTGAA-----GCTGTTCTCCAGAA-CTTCAAATCAGGTG-----  
CCAGAGCTTTAACTGATGCTGAAACCAAGGCCTTCCTGTCAGCTGGAGACTCTGATGGTGATGGCAAAATTGGAGTTGAA  
>Xenopus\_laevis\_MGC\_NC\_030741\_-\_MGC82582\_CDS  
TGACATCAACTCTGCTCTGCAGAACTGCCAAG-----  
-----CTGCTGACTCCTTCAA---CTTCAAACTTTCTTT-----  
GCCCAGTCTGGTCTGAGCAGCAAGTCCGCAGATGATGTGAGAAAAGTCTTTGCCATCATCGACCAGGACCAGAGCGGCTTCGTTGAG  
GAAGATGAACTGAA-----GCTGTTCTCCAGAA-CTTCAAATCAGGTG-----  
CCAGAGCTTTAACTGATGCTGAGACCAAGGCCTTCCTGTCAGCTGGAGACTCTGATGGTGATGGCAAAATTGGAGTTGAA  
>Xenopus\_laevis\_OCM\_NC\_030740\_-\_ocm. 2. L\_CDS  
TGACATCTCCTCTGCTCTGCAGAACTGCCAAG-----  
-----CTGCTGACTCCTTCAA---CTTCAAACTTTCTTT-----  
GCCCAGTCTGGTCTGAGCAGCAAGTCTGCAGCTGATGTGAAAAACGTCTTTGCCATCCTTGACCAGGACCAGAGCGGCTTCATTGAG  
GAAGATGAACTGAA-----GCTGTTCTCCAGAA-CTTCAGCGCCGGTG-----  
CCAGAGCATTAACTGATGCTGAGACCAAGGCCTTCCTGTCAGCTGGAGACTCTGATGGTGATGGCAAAATTGGAGTTGAA  
>Xenopus\_laevis\_PARV\_beta\_like\_NC\_030740\_-\_LOC108701579\_CDS  
TGACATCTCCTCTGCTCTGCAGAACTGCCAAG-----  
-----CTGCTGACTCCTTCAA---CTTCAAACTTTCTTT-----  
GCCCAGTCTGGTCTGAGCAGCAAGTCTGCAGCTGATGTGAAAAACGTCTTTGCCATCCTTGACCAGGACCAGAGCGGCTTCATTGAG  
GAAGATGAACTGAA-----GCTGTTCTCCAGAA-CTTCAGCGCCGGTG-----  
CCAGGGCCTTTAACTGATGCTGAGACCAAGGCCTTCCTGTCAGCTGGAGACTCTGATGGTGATGGCAAAATTGGAGTTGAA  
>Xenopus\_laevis\_PARV\_beta\_like\_NC\_030740\_-\_LOC108701582\_CDS  
TGACATCTCCTCTGCTCTGCAGAACTGCCAAG-----  
-----CTGCTGACTCCTTCAA---CTTCAAACTTTCTTT-----  
GCCCAGTCTGGTCTGAGCAGCAAGTCTGCAGCTGATGTGAAAAACGTCTTTGCCATCCTTGACCAGGACCAGAGCGGCTTCATTGAG  
GAAGATGAACTGAA-----GCTGTTCTCCAGAA-CTTCAGCGCCGGTG-----  
CCAGAGCTTTAACTGATGCTGAGACCAAGGCCTTCCTGTCAGCTGGAGACTCTGATGGTGATGGCAAAATTGGAGTTGAA  
>Xenopus\_laevis\_PARV\_beta\_like\_NC\_030740\_-\_LOC108701580\_CDS  
TGACATCTCCTCTGCTCTGCAGAACTGCCAAG-----  
-----CTGCTGACTCCTTCAA---CTTCAAACTTTCTTT-----  
GCCCAGTCTGGTCTGAGCAGCAAGTCTGCAGCTGATGTGAAAAACGTCTTTGCCATCCTTGACCAGGACCAGAGCGGCTTCATTGAG  
GAAGATGAACTGAA-----GCTGTTCTCCAGAA-CTTCAGCGCCGGTG-----  
CCAGGGCCTTTAACTGATGCTGAGACCAAGGCCTTCCTGTCAGCTGGTGACTCTGATGGTGATGGCAAAATTGGAGTTGAA

>Xenopus\_laevis\_PARV\_beta\_like\_NC\_030740\_-\_LOC108701581\_CDS

TGACATCTCTGCTCTGCAGAACTGCCAAG-----  
-----CTGCTGACTCCTTCAA---CTTCAAACTTTCTTT-----  
GCCCAGTCTGGTCTGAGCAGCAAGTCTGCAGCTGATGTGAAAAACGTCTTTGCCATCCTTGACCAGGACCAGAGCGGCTTCATTGAG  
GAAGATGAACTGAA-----GCTGTTCTCCAGAA-CTTCAGCGCCGGTG-----  
CCAGGGCTTTAACTGATGCTGAGACCAAGGCCTTCCTGTCAGCTGGAGACTCTGATGGTGATGGCAAAATTGGTGTTGAA

>Xenopus\_laevis\_PARV\_pvalb2.L\_NC\_030740\_-\_CDS

TGACATCGCCTCTGCTCTGCAGAACTGCCAAG-----  
-----CTGCTGACTCCTTCAA---CTTCAAACTTTCTTT-----  
GCCCAGTCTGGTCTGAGCAGCAAGTCTGCAGCTGATGTGAAAAACGTCTTTGCCATCCTTGATCAGGACCAGAGCGGCTTCATTGAG  
GAAGATGAACTGAA-----GCTGTTCTCCAGAA-CTTCAGCGCCGGTG-----  
CCAGAGCTTTAACTGATGCTGAGACCAAGGCCTTCCTGTCAGCTGGAGACTCTGATGGTGATGGCAAAATTGGAGTTGAA

>Xenopus\_laevis\_MGC\_NC\_030741\_-\_MGC53945\_CDS

TGACATCTCTGCTGCCCTGCAGAACTGCCAAG-----  
-----CTGCTGACTCCTTCAA---CTTCAAACTTTCTTT-----  
GCCCAGTCTGGTCTGAGCAGCAAGTCTGCAGATGTTGTGAAAAACGTCTTTGCCATCATCGACCAGGACCAGAGCGGCTTCATTGAG  
GAAGAGGAACTGAA-----GTTGTTCTCCAGAA-CTTCAGCGCAAGTG-----  
CCAGGGCATTGACTGATGCGGAAACCAAGGCCTTCCTGGCAGCTGGTGACGCTGATGGTGATGGCAAAATTGGAGTTGAC

>Xenopus\_laevis\_OCM\_NC\_030740\_-\_ocm\_CDS

TGACATCTCTGCTGCCCTGCAGAACTGCCAAG-----  
-----CTGCTGACTCCTTCAA---CTTCAAACTTTCTTT-----  
GCCCAGTCTGGTCTGAGCAGCAAGTCCGCAGATGATGTGAAAAACGTCTTTGCCATCCTCGACCAGGACAGGAGCGGCTTCATTGAG  
GAAGAGGAACTGAA-----GTTGTTCTCCAGAA-CTTCAGCGCAAGTG-----  
CCAGGGCATTGACTGATGCTGAAACCAAGGCCTTCCTGGCAGCTGGTGACTCTGATGGTGATGGCAAAATTGGAGTTGAA

>Xenopus\_laevis\_OCM\_NC\_030685\_-\_ocm4.5\_mRNA

TGACATCTCTGCTGCCCTGCAGAACTGCCAAG-----  
-----CCCCTGACTCCTTCAA---CTTCAAACTTTCTTT-----  
GCCCAGTCTGGCCTGAGCAGCAGTCTGCAGATGATGTGAAGAATGTCTTTGGCATCCTGGACCAGGACAGGAGTGCGCTTCATTGAG  
GAAGATGAACTGAA-----ACTGTTCTCCAGAA-CTTCAGCGCAGGTG-----  
CCAGGGCTTTAACTGATGCTGAGACCAAGGCCTTCCTGGCAGCTGGAGACTCTGATGGTGATGGCAAAATTGGAGTTGAA

>Xenopus\_laevis\_OCM\_NC\_030685\_-\_ocm4.2\_CDS

TGACGTCTCTGCTGCTCTGCAGAACTGCCAAG-----  
-----CTCCTGAATCCTTCAA---CTTCAAACTTTCTTT-----  
GCCCAGTCTGGCCTGAGCAGCAAGTCCGACAATGATGTGAGGAACGTCTTTGCCATCCTTGACCAGGACAGGAGCGGCTTCATTGAG  
GAAGATGAACTGAA-----ACTGTTCTCCAGAA-CTTCAACGCAGGTG-----  
CCAGGGCTTTAACTGATGCTGAGACCAAGGCCTTCCTGAATGCTGGTGACTCTGATGGTGATGGCAAAATTGGAGTTGAT

>Xenopus\_laevis\_OCM\_NC\_030685\_-\_ocm4.3\_mRNA

TGACATCTCTGCTGCTCTGAAGAACTGCCAAG-----  
-----CTCCTGACTCCTTCAA---CTTCAAACTTTCTTT-----  
ACCCAGTCTGGCCTGAGCAGCAAGTCCGACAATGATGTGAGGAACGTCTTTGCCATCATTGACCAGGACAAGAGCGGCTTCATTGAG  
GAAGATGAACTGAA-----ACTGTTCTCCAGAA-CTTCAGCGCAGGTG-----  
CCAGGGCTTTAACCGATGCTGAGACCAAGGCCTTCCTGAATGCTGGTGACTCTGATGGTGATGGCAAAATTGGAGTTGAT

>Xenopus\_laevis\_OCM\_NC\_030685\_-\_ocm4.4\_CDS

TGACATCTCTGCTGCTCTGCAGGCTTGCCAAG-----  
 -----CCCCTGACTCCTTCAA---CTACAAATCCTTCTTT-----  
 GCCCAGTCTGGCCTGAGCAGCAAGTCCGTCGATGATGTGAGAAACGCCTTTGCCATCCTTGACCAGGACAAGAGCGGCTTCATTGAG  
 GAAGATGAATTGAA-----ACTGTTCTCCAGAA-CTTCAGCGCAGGTG-----  
 CCAGGGCTTTGACTGATGCTGAGACCAAGGCCTTCCTGAATGCTGGTGAAGTCTGATGGTGATGGCAAAATTGGAGTTGAT  
 >Xenopus\_laevis\_PARV\_beta\_like\_NC\_030740\_-\_LOC108701583\_CDS  
 TGACATTTCTGCTGCTCTGAATGACTGCCAAG-----  
 -----CTGCTGAATCCTTCAA---CTACAAAGCCTTTTTT-----  
 GCTAAGTCTGGTCTGAGCAGCAAGTCCGCTGAAGATGTGAGAAACGTCTTTGCCATCCTCGACCAGGACAGGAGTGGCTTCATTGAG  
 GAAGATGAACTGAA-----GCTGTTCTCCAGAA-CTTCAGCGCCAGTG-----  
 CCAGGGCTTTAAGTATGCTGAAACCAAGGCCTTTCTGTGAGCTGGAGACTCTGATGGTGATGGCAAAATTGGAGTTGAT  
 >Xenopus\_laevis\_OCM\_NC\_030685\_-\_ocm4.1\_CDS  
 TGATGTCAGCGCTGCTCTCCAGAGCGTCCAGG-----  
 -----CTGCCGACTCCTTCAA---CTACAAATCCTTCTTT-----  
 GCCAAGTCTGGCCTGAGCAGCAAGTCCGCTGATGATGTAAAGAAAGTCTTTGCCATCCTTGACCAGGACAAGAGCGGCTTCATTGAG  
 GAAGATGAATTGAA-----ACTGTTCTCCAGAA-CTTCAACTCAGGTG-----  
 CCAGGGCACTGACTGATGCTGAGACCAAGGCCTTCCTGGCAGCTGGTGAAGTCTGATGGTGATGGCAAAATTGGAGTTGAT  
 >Anguilla\_anguilla\_NC\_049202\_-\_LOC118219560\_CDS\_2nd  
 TGACATCACTGCAGCCCTGCAGGCATGCCAAG-----  
 -----CTGCTGACAGTTTCAA---CTACAAGAGCTTCTTT-----  
 GCCAAGGTCGGCATTTCAGGCAAATCTGCCGATATTGTCAAGAAGGTTTTGCCATCCTTGACCAGGACAAGAGTGGCTTCATTGAG  
 GAGGATGAGCTTAA-----ACTGTTCTGCAGAA-CTTCTCTGGTAGTG-----  
 CCAGAGCACTGACTGATGCTGAAACCTCAGCCTTCCTTAAAGCTGGGGACACTGATGGTGACGGCAAGATTGGAATTGAT  
 >Cyprinus\_carpio\_PARV10\_\_cluster\_1st\_parv\_2like\_LOC109100277\_cDNA  
 TGATGTGGCTGCAGCTCTTAAGGACTGCTCTG-----  
 -----CTGCTGACTCCTTCAA---CTACAAGAGCTTCTTC-----  
 GCCAAGGTCGGCCTGACCGCAAAGACTCCCGATGACATCAAGAAAGCCTTCTTCGTCATCGACCAGGACAAGAGCGGCTTCATTGAG  
 GAGGATGAGCTGAA-----ACTGTTCTGCAGAA-CTTCGCCGCTGGCG-----  
 CCAGGGCATTGACTGATGCTGAGACCAAGGCCTTCCTCTCAGCTGGTGACAGTATGGTGACGGCAAAATCGGAGTTGAT  
 >Cyprinus\_carpio\_PARV16\_cluster\_2nd\_parv\_2\_LOC109049716\_cDNA  
 GGATGTGGCTGCAGCCCTTAAGGATTGCGCTG-----  
 -----CTGCTGACTCCTTCAA---CTACAAGACCTTTTTTC-----  
 GCCAAGGTTGGCCTGAGTGCAAAGACTCCCGATGACATCAAGAAGGCCTTCTTTGTCATTGACCAGGACAAGAGTGGCTTCATTGAG  
 GAGGATGAGCTGAA-----ACTGTTCTGCAGAA-CTTCTCCGCTGGTG-----  
 CCAGGGCACTGACTGATGCTGAGACCAAGGCCTTCCTCTCAGCTGGTGACAGCGATGGTGACGGCAAAATTGGAGTTGAT  
 >Danio\_rerio\_NC\_007123\_-\_pvalb2\_CDS  
 GGATGTGGCTGCAGCCCTTAAGGATTGCGCTG-----  
 -----CTGCCGACTCTTTCAA---CTACAAGAACTTCTTC-----  
 GCCAAGGTTGGCCTGAGCGCTAAGTCTCCCGATGACATCAAGAAGGCCTTCTTCGTCATTGACCAGGACAAGAGCGGCTTCATTGAG  
 GAGGATGAGCTGAA-----ACTGTTCTGCAGAA-CTTCTCCGCTGGTG-----  
 CCAGGGCATTGACCGATGCTGAGACCAAGGCCTTCCTCTCAGCTGGCGACAGTATGGCGACGGCAAAATTGGAGTTGAT  
 >Paramormyrops\_kingsleyae\_PARV\_2\_NW\_019716143\_-\_LOC111842483\_CDS  
 GGATGTGGCTGCTGCCCTTAAGGACTGCGCAG-----  
 -----CCCCTGACTCTTTCAA---CCACAAGTCCTTCTTT-----

GCTAAAGTTGGCCTGGCAAGCAAGTCTGCTGATGACGTCAAGAAGGCCTTTGCCGTCATTGACCAGGACAAAAGTGGCTTCATTGAG  
 GAGGATGAACTGAA-----GCTCTTCCTGCAGAA-CTTCTCTGCTAGTG-----  
 CCAGAGCTCTGACTGATGCAGAGACCAAGACCTTCCTTGCCGCCGAGACAGCGACGGTGATGGCAAGATTGGAGCTGAT  
 >Esox\_lucius\_NC\_025972\_LOC105005800\_2ndhalf\_parvalbumin  
 TGATGTGGCTGCAGCCCTCGCTGCATGCTCAG-----  
 -----CTGCTGACTCCTTCAA---ACACAAGGAGTTCTTC-----  
 GCCAAGGTTGGCCTGGCAAGCAAGTCCCTTGATGACGTGAAGAAGGCCTTCTACGTCATTGACCAGGACAAGAGTGGCTTCATTGAG  
 GAGGATGAGCTCAA-----GCTGTTCTGCAGAA-CTTCTCCCATCTG-----  
 CCAGAGCCCTGACCGATGCTGAGACCAAGGCCTTCCTGGCTGATGGAGACAAGGACGGTGATGGCATGATCGGAGTTGAT  
 >Salmo\_salar\_NC\_027300\_3rd\_LOC106609875  
 TGATGTTGCTGCAGCCCTCGCTGCTTGCACAG-----  
 -----CTGCTGACTCCTTCAA---CCACAAGGCGTTCTTT-----  
 GCCAAGGTTGGCCTGGCCAGCAAGTCCAGCGATGACGTGAAGAAGGCCTTCTACGTCATTGACCAGGACAAGAGTGGCTTCATTGAG  
 GAGGATGAGCTCAA-----GCTGTTCTGCAGAA-CTTCTCTGCTTCTG-----  
 CCAGAGCCCTGACTGACGCTGAGACCAAGGCTTTCCTGGCTGATGGGGACAAGGATGGTGATGGCATGATTGGAGTTGAT  
 >Salmo\_salar\_NC\_027327\_3rd\_prvb  
 TGATGTTGCTGCAGCCCTCGCTGCTTGCACAG-----  
 -----CTGCTGACTCCTTCAA---CCACAAGGCTTTCTTT-----  
 GCCAAGGTTGGCCTGGCCAGCAAGTCCAGCGATGATGTGAAGAAGGCCTTCTACGTCATTGACCAGGACAAGAGTGGCTTCATTGAG  
 GAGGATGAGCTCAA-----GCTGTTCTGCAGAA-CTTCTCTGCCTCTG-----  
 CCAGAGCCCTGACTGACGCTGAGACCAAGGCTTTCCTGGCTGACGGGGACAAGATGGTGATGGCATGATTGGAGTTGAT  
 >Salvelinus\_alpinus\_AF538282\_-\_parvalbumin\_beta\_542\_CDS  
 UGAUGUUGCUGCAGCCCUCGUGCUUGCACAG-----  
 -----CUGCUGACUCCUUCAA---CCACAAGGCUUUCUU-----  
 GCCAAGGUUGGCCUGGCUGGCAAGUCCAACGAUGAUGUGAAGAAGGCCUUCUACGUCAUUGACCAGGACAAGAGUGGCUUCAUUGAG  
 GAGGAUGAGCUCAA-----GCUGUUCUGCAGAA-CUUCUCUGCCUCUG-----  
 CCAGAGCCCUGACUGACGCUGAGACCAAGGCUUUCUGGCUGACGGGGACAAGAUGGUGAUGGCAUGAUUGGAGUUGAU  
 >Gadus\_morhua\_NC\_044065\_3rd\_LOC115531334\_parv  
 TGACATCACTGCAGCCCTGGCGGCCTGCAAAG-----  
 -----CTGAGGGCTCCTTCGA---CCACAAGGCGTTCTTC-----  
 ACTAAAGTCGGCCTGGCCGCAAGTCCCCGCTGACATCAAGAAGGTGTTTGAGATCATTGACCAGGACAAGAGTGACTTTGTTGAG  
 GAGGATGAGCTGAA-----GCTGTTCTCCAGAA-CTTACGCGCCGGTG-----  
 CCAGAGCTCTGAGTGACGCTGAGACCAAGGTTTTCCTGAAGGCCGGAGACTCTGACGGTGACGGCAAGATCGGAGTTGAT  
 >Gadus\_morhua\_AY035585\_clone2  
 UGACAUCACUGCAGCCCUGGCGGCCUGCAAAG-----  
 -----CUGAGGGCUCCUUCGA---CCACAAGGCGUUCUUC-----  
 ACUAAAGUCGGCCUGGCCGCAAGUCCCCGCGUGACAUCAAGAAGGUGUUUGAGAUCAUUGACCAGGACAAGAGUGACUUUGUUGAG  
 GAGGAUGAGCUCAA-----GCUGUUCUCCAGAA-CUUCAGCGCCGGUG-----  
 CCAGAGCUCUGAGUGACGCUGAGACCAAGGUUUUCCUGAAGGCCGGAGACUCUGACGGUGACGGCAAGAUCGGAGUUGAU  
 >Cyprinus\_carpio\_PARV03\_cluster\_2nd\_parv\_betallike\_LOC109097013\_cDNA  
 TGATGTGGATGCTGCTCTCGCTGCCTGCCAGG-----  
 -----CTGCTGACTCCTTCGA---CTACAAGACTTTCTTC-----  
 GCCAAGGTTGGTCTGTCCGCAAGTCCGCTGATGACGTCAAGAAGGCCTTTCGCCATCATTGACCAGGACAACAGCGGCTTCATTGAG

GAGGAGGAGCTGAA-----GCTGTTCTGCAGAA-CTTCAAGGCCAGTG-----  
CCAGGGCTCTGACCGACAAAGAGACCAAGGCCTTCTCTCTGCTGGTGACAGTGATGGTGATGGCAAGATTGGAGCTGAA  
>Cyprinus\_carpio\_PARV07\_cluster\_6th\_parv\_betallike\_LOC109096999\_cDNA  
TGATGTGGATGCTGCTCTTGCTGCCTGCCAGG-----  
-----CTGCTGACTCCTTCGA---CTACAAGGCTTTCTTC-----  
GCCAAGGTTGGCCTGTCCGCCAAGTCCGCCGATGACGTCAAGAAGGCTTTCGGCATCATTGACCAGGACAACAGCGGCTTCATTGAG  
GAGGAGGAGCTGAA-----GCTGTTCTGCAGAA-CTTCAAGGCTGATG-----  
CCAGGGCTCTGACCGACAAAGAGACCAAGGCCTTCTGTCTGCTGGTGACAGTGATGGTGATGGCAAGATTGGAGCTGAA  
>Danio\_rerio\_NC\_007114\_-\_pvalb1\_CDS  
TGATGTTGATGCTGCTCTCGCCGCTGCCAGG-----  
-----CTGCCGACTCCTTCGA---CTACAAGTCTTTCTTC-----  
GCCAAGGTCGGTCTGTGACGCCAAATCTGCCGATGAGGTGAAAAAGGCTTCGCCATCATCGACCAGGACAACAGCGGCTTCATTGAG  
GAGGAGGAGCTGAA-----GCTTTCTGCAGAA-CTTCAAGGCCAACG-----  
CCAGAGTTCTGACCGATAAAGAGACCAAGCTTCTCTCCGCTGGAGACAGCGATGGTGATGGCAAGATCGGAGCTGAA  
>Epinephelus\_coioides\_GU933125\_-\_parvalbumin\_2\_CDS  
UGAUGUCAAGCCGCUAUUGCCGGCUGCUCAG-----  
-----CCGCCGACUCCUUCGA---CCACAAGAAGUUCUUC-----  
AAGGCAUGCGGCAUGUCCGGCAAGUCCGUGAUGAGGUCAGAAGGCCUUCGCCAUCAUUGACCAGGACAACAGUGGCUUCAUUGAG  
GAGGAGGAGCUCAA-----GCUGUUCCUGCAGAA-CUUCUCUGCUGGAG-----  
CCAGAGCCCUGACUGACAAGGAGACCAAGGCUUUCUGCCGUGGUGACAGUGAUGGUGAUGGCAAGAUCGGAGUCGAA  
>Sparus\_aurata\_NC\_044209\_2nd\_LOC115575576  
TGAGGTGAAAGCTGCCCTGGACGGCTGCTCAG-----  
-----CTGCTGACTCCTTCAA---CTACAAGTCTTTCTTC-----  
AAGGCATGCGCCTGTCCGGCAAGTCTCCGATGAGGTCAAGAAGGCTTTCGCCATCATTGACCAGGACAACAGTGGCTTCATTGAG  
GAGGATGAGCTCAA-----GCTGTTCTGCAGAA-CTTCGTTGCCTCCG-----  
CCAGAGCACTCACCAGACAAGGAGACCAAGGCTTCTCTCCGCTGGTGACAGTGACGGTGACGGCAAGATCGGAGTCGAT  
>NeoBri\_NW\_006272021\_extraction\_-\_LOC102780507\_CDS  
TGAGGTGAAAGCAGCTCTGGATGGCTGCGCAG-----  
-----CTGCTGACTCCTTCGA---CTACAAGAAGTTCTTC-----  
CAGGCCAGCGGCCTGGCTGCAAAAAGTGCCGATGATGTGAAGAACGCTTCAAAATCATTGACCAGGACAACAGCGGCTTCATTGAG  
GAGGAGGAGCTGAA-----GCTGTTCTGCAGAA-CTTCTCTGCTACTG-----  
CCAGAGCACTCACTGACAAGGAGACCAAGGCTTCTCTCAACGCTGGTGACAGTGATGGTGATGGCAAGATCGGAATTGAT  
>Oreochromis\_mossambicus\_DQ124253\_-\_parvalbumin\_CDS  
UGAUGUGAAAGCAGCUCUGGAUGGUGCGCAG-----  
-----CUGCUGACUCCUUCGA---CUACAAGAGGUUCUUC-----  
AAGGCCAGCGGCCUGGUGCAAAAACUGCCGAUGAUGUGAAGAAAGCCUUCAAAAUCAUUGACCAGGACAACAGCGGCUUCAUUGAG  
GAGGAGGAGCUGAA-----ACUGUUCUGCAGAA-CUUCUCUGCUGGAG-----  
CCAGAGCACUCACUGACAAGGAGACCAAGGCUUUCUCUCCGUGGUGACAGUGAUGGUGAUGGCAAGAUUGGAAUUGAU  
>Tilapia\_NC\_031969\_03\_LOC100692910\_parvalbumin\_beta  
TGATGTGAAAGCAGCTCTGGATGGCTGCGCAG-----  
-----CTGCTGACTCCTTCGA---CTACAAGAAGTTCTTC-----  
AAGGCCAGCGGCCTGGCTGCAAAAAGTGCCGATGATGTGAAGAAAGCCTTCAAAATCATTGACCAGGACAACAGCGGCTTCATTGAG  
GAGGAGGAGCTGAA-----GCTGTTCTGCAGAA-CTTCTCTGCTGGTG-----  
CCAGAGCACTCACTGACAAGGAGACCAAGGCTTCTCTCCGCTGGTGACAGTGATGGTGATGGCAAGATCGGAATTGAT

>tuna\_BKCK01000006\_parv\_cluster\_2nd\_cDNA

TGACATGAAAGCAGCTCTGGATGGCTGCGCAA-----  
-----GTGCTGACTCCTTTGA---CTACAAGAAGTTTTTC-----  
AAGGCATGCGGACTGGCCGGCAAGTCTGCAGATGATGTCAAGAACGCCTTCAAAATCATTGACCAGGACAACAGCGGCTTCATTGAG  
GAGGAGGAGCTGAA-----GCTCTTCCTGCAGAA-CTTCTCTGCTACCG-----  
CCAGAGCACTCACTGACAAGGAGACCAAGGCTTTCCTCGCCGCTGGTGACAGTGATGGTGATGGCAAGATCGGAATCGAA

>Paralichthys\_olivaceus\_AY953372\_-\_parvalbumin\_CDS

UCAGGUGAAAGCCGCUCUGGACGGCUGCGCAG-----  
-----CUGCUGAUUCCUCAA---UUACAAGAAUUUCUUC-----  
GCCGCCUGUGGCCUGGCCGGCAAGAGCGCCGAUGAAGUCAAGGUAGCCUUCGGCGUCAUUGACCAGGACGGCAGUGGCUUCAUUGAG  
GAGGAAGAGCUGAA-----GCUGUUCUGCAGAA-CUUCUCUGCUGGUG-----  
CCAGAGCACUCACUGACAAGGAGACCAAGGAUUUCUCGCCGUGGUGACAGUGAUGGUGAUGGCAAGAUCGGAGUCGAG

>Gadus\_morhua\_NC\_044049\_1st\_LOC115537300\_parv

TGACGTCAAGGCCGCCCTCGCCGGCTGCGCAG-----  
-----CTGCTGACTCCTTCAG---CTACAAGACCTTCTTC-----  
AAGGCATGCGGTCTGGCCGCCAAGTCCCACGAGGAAGTCAAGAAGGCTTCTTCGTCATTGACCAGGACCAGAGCGGCTTCATTGAG  
GAGGATGAGCTTAA-----GCTCTTCCTGCAGAC-CTTCGGCGCCGGAG-----  
CAAGGGAACCTACCGCTGCTGAGACCAAGGCCTTCTCGCCGCTGGTGACGTTGATGGTGATGGCATGATCGGAGTTGAT

>Theragra\_chalcogramma\_clone\_1\_AY035586\_-\_parvalbumin\_CDS

UGACGUCAAGGCCGCCUCGCCGGCUGCGCAG-----  
-----CUGCUGACUCCUCAA---CUACAAGACCUUCUUC-----  
AAGGCAUGCGGUCUGGCCGCCAAGUCCCACGAGGAAGUCAAGAAGGCUUUCUUGUCAUUGACCAGGACCAGAGCGGCUUCAUUGAG  
GAGGAUGAGCUUAA-----GCUCUUCUGCAGAC-CUUCGGCGCCGGAG-----  
CAAGGGAACUCACCGCUGCUGAGACCAAGGCCUUCUCGCCGUGGUGACGAGGAUGGUGAUGGCAUGAUCGGAGUUGAU

>Esox\_lucius\_NC\_025972\_LOC105005800\_1sthalf\_parvalbumin

GGATGTGGCAGCCGCCCTGCAGGCGTTCGCAG-----  
-----CCGCCGACTCCTTCAA---CCACAAGCAGTTCTTC-----  
GCCAAGGTTGGCCTGGCCGGTAAGTCCGATGAGGATTTGAAGAAAGCCTTCTACTTGGTTGACCAGGACAAGAGTGGCTTCATTGAG  
GAGGAGGAGCTCAA-----GCTGTTCTGCAGAC-CTTCTCTGCTGGAG-----  
CCAGGGCTCTGACAGACACAGAGACCAAGGCCTTCCTTGACGCTGGAGATGTTGATGGTGACGGCATGATCGGAGTCGAT

>Salmo\_salar\_NC\_027300\_2nd\_LOC106609864

GGATATCGCTGCTGCCCTCAAGCATTGTGAAG-----  
-----CTGCTGAGTCCTTCAA---CCACAAGGAGTTCTTC-----  
GCCAAGGTTGGCCTGGCTGGCAAGTCTGCTGAGGATTTGAAGAAAGCCTTCTACTTCGTTGACCAGGACAAGAGTGGCTTCATTGAG  
GAAGATGAGCTCAA-----GCTGTTCTCCAGAC-CTTCTCTGCTGGTG-----  
CCAGAGCTCTGACAGATAAAGAGACCAAGGCCTTCCTTGACGAGGAGATGTTGATGGTGATGGCATGATCGGAGTAGAT

>Salmo\_salar\_NC\_027327\_2nd\_pvalb2

GGACATCGCTGCTGCCCTCCAGCATTGCGCAG-----  
-----CTGCTGACTCCTTCAA---CCACAAGGAGTTCTTC-----  
GCCAAGGTTGGCCTGGCTGGCAAGTCTACTGAGGATTTGAAGAAAGCCTTCTACTTGGTTGACCAGGACAAGAGTGGCTTCATTGAG  
GAGGATGAGCTCAA-----GCTGTTCTCCAGAC-CTTCTCTGCTGGTG-----  
CCAGAGCTCTGACAGATAAAGAGACCAAGGCCTTCCTTGCGGCAGGAGATGCTGATGGTGATGGCATGATTGGAGTGGAT

>Salvelinus\_alpinus\_AF538283\_-\_parvalbumin\_beta\_27\_CDS

GGAAUUAUUGCUGCUGCCCUCCAGCAUUGCGCAG-----  
-----CUGCUGAGUCCUCAA---CCACAAGGAGUUCUUC-----  
GCCAAGGUUGGCCUGGCUGGCAAGUCUACUGAGGAUUUGAAGAAAGCCUUCUACUUUGUUGACCAGGACAAGAGUGGCUUCAUUGAG  
GAGGAUGAGCUCAA-----GCUGUUCUCCAGAC-CUUCUCUGCUGGUG-----  
CCAGAGCUCUGACAGAUAAAGAGACCAAGGCCUUCUUGCGGCAGGAGAUGCUGAUGGUGAUGGCAUGAUUGGAGUGGAU  
>Anguilla\_anguilla\_NC\_049217\_-\_LOC118216204\_CDS\_2nd  
TGACATCACCGCTGCTCTTGCAGCTTGCCAGG-----  
-----GTGCTGACAGTTTCGA---CTACAAGAGCTTCTTC-----  
GCCAAGGTCGGCTTGAGCGGCAAGACCCCCGACGAAATCAAGAAGGCTTCTCCATCATTGACCAGGACAACAGTGGCTTCATTGAG  
GAGGATGAGCTGAA-----GCTGTTCTGCAGAA-CTTCTCCGCCGGTG-----  
CCAGAGCGCTCACCGACAAAGAGACTAAAACCTTCTTGGCCGAGGAGACACCGACGGCGACGGCAAGATCGGAATTGAT  
>Anguilla\_anguilla\_NC\_049217\_-\_pvalb4\_CDS\_3rd  
GGACATCACTGCAGCCCTCGAGGCATGCAAAG-----  
-----CCGCCGACTCTTTCAA---CTACAAAGCATTCTTC-----  
GCAAAGGTTGGCCTGGCCACAAAATCTGCTGATGACATCAAGAAGGCCTTCAACATCATTGACCAGGACAAGAGCGGCTTCATTGAG  
GAGGATGAGCTGAA-----ACTGTTCTGCAGAA-CTTCTCCAAAAGTG-----  
CAAGAGCGCTGACTGACAAAGAGACAAAGGCTTTCCTCCACGCAGGCGACACCGACGGCGACGGCAAAATCGGCATAGAT  
>Anguilla\_japonica\_AB375263\_-\_Ang\_j\_1\_CDS  
GGACAUCACUGCAGCCUCGAGGCAUGCAAAG-----  
-----CCGCCGACUCUUUCAA---CUACAAAGCAUUCUUC-----  
GCAAAGGUUGGCCUGUCCAUAUAAUUCUCCUGAUGACAUAAGAAGGCCUUCAGCAUCAUUGACCAGGACAAGAGCGGCUUCAUUGAG  
GAGGAUGAGCUGAA-----ACUGUUCUGCAGAA-CUUCUCCAAAGGUG-----  
CAAGAGCGCUGACUGACAAAGAGACAAAGGCUUUCUCCAAGCAGGCGACACCGACGGCGACGGCAAAAUCCGGCAUAGAU  
>Lepisosteus\_oculatus\_PARV\_beta\_like\_NC\_023191\_-\_LOC102692297  
AGACATTGCAGCTGCCCTCAAGACCTGTGAAG-----  
-----CGGCGGGCTCTTTCAA---TCACAAGACCTTCTTC-----  
GCCGAAGTGGGGCTGGCCAGCAAGCCCGACTCCGAGGCAGAGAAAGTGTTCAAAATCCTGGACCAGGACCAGAGCGGATTCAATTGAG  
GAGGATGAGCTGAA-----GCTGTTCTGCAGAA-CTTCTCCGCCAGCG-----  
CCAGAGTCTTGACCGACGCCGAGACCAAGACCTTCTTGGCCGCCGAGACTCCGACGGTGACGGCAAGATCGGAGTGGAT  
>Lepisosteus\_oculatus\_PARV\_beta\_like\_NC\_023191\_-\_LOC102697638  
GGACATCACGGCCGCGCTCCAGGCATGCCAAG-----  
-----CGGCGGGCTCCTTTGA---TCACAAGGCCTTCTTC-----  
GCCCAGGTGGGGCTGGCCAGCGATTCTGCCGTGGCCGCGGAGAAGGCCTTCAGGATCCTGGACCGGGACCAGAGCGGATTCATCGAG  
GAGGAAGAGCTGAA-----GCTGTTCTGCAGAA-CTTCAAGGCCGACG-----  
CCAGAGTCTTGACGGACGCCGAGACCAAGGCCTTCTTGGCCGCCGCCGACCTGGACAGCGATGGCAAGATCGGCGCTCAA  
>Polypterus\_senegalus\_PARV\_beta\_NC\_053166\_-\_LOC120543078  
AGATATCGCTGCTGCAATCAAGAATTGCCAAG-----  
-----CCGCTGATTCTTTCAA---CCACAAGACCTTCTTC-----  
TCTCAGGTCGGCCTGGCCAACAAGTCTGCAGCCGACGTAGCAAAAGTCTTCAAGATCCTGGACCAGGACCACAGCGGCTTCATTGAG  
GAGGATGAGCTTAA-----GCTGTTCTCCAGAA-CTTCCAGTCCAGTG-----  
CTCAGAGCTCTAACTGATGCCGAGACTAAAACCTTCTTGGCTGCAGGCGATTGACACGGTGACGGCAAAATCGGAGTAGAA  
>Acipenser\_ruthenus\_PARV\_NC\_048335\_2nd\_LOC117973483  
GGATATCGCCGACCCATCAAGGACTGCCAAG-----  
-----CTCCGGAATCCTTCAA---TCACAAGGCATTCTTT-----

GCCAAGGTTGGTCTGGCTAGTAAGTCTGCTGCAGATACAGAAAAAGTTTCAAAATCATTGACCAGGACCAGAGCGGATTCATTGAG  
 GAAGAAGAGCTGAA-----GCTGTTTCTGCAGAA-TTTCTCTGCTGGCG-----  
 CCAGAGCTCTGACTGATAAAGAGACCGCTGTGTTCTCGCAGCTGGTGAAGTCCGACGGTGACGGCAAAATCGGAGTTGAT  
 >Acipenser\_ruthenus\_PARV\_beta\_like\_NC\_048337\_2nd\_LOC117431643  
 GGATATCGACGCAGCCGTCAAGGACTGCCAAG-----  
 -----CTCCGGAATCCTTCAA---TCACAAGGCATTCTTT-----  
 GCCAAGATTGGTCTGGCTAGCAAGTCTGCCGCAGATACAGAAAAAGTTTCAAAATCATTGACCAGGACCAGAGCGGATTCATTGAG  
 GAAGAAGAGCTGAA-----GCTATTTCTGCAGAA-CTTCTCCGCTGCTG-----  
 CCAGATCTCTGACTGATAAAGAGACCGCTGTGTTCTGGCAGCTGGCGATGCCGATGGTGATGGCAAAATCGGAATTGAT  
 >Gadus\_morhua\_NC\_044049\_2nd\_LOC115537726\_parv  
 GGAAGTTGCTGCAGCCCTGGAAGCCTGCAAAT-----  
 -----CGGCCGGCTCATTGA---CCATACAAAGTTTTTC-----  
 AAATCCTGCGGTCTGGCCGGTAAGTCTCCGATGACGTCAAGAAGGCCTTCGGCATCATTGACCAGGACCAGAGCGACTTCATTGAG  
 GAGGAGGAGCTGAA-----GCTGTTCTGCAGAA-CTTCAGCGCAAGTG-----  
 CACGCGCCTGAGCGATGCTGAGACAAAGGCTTTCTGAAGGCCGGAGACTCCGACGGGGACGGCAAGATAGGAGTTGAT  
 >Theragra\_chalcogramma\_clone\_2\_AY035587\_-\_parvalbumin\_CDS  
 GGAAGUUGCUGCAGCCUGGAAGCCUGCAAAU-----  
 -----CCGCCGGCUCAUUUGA---CCAUACAAAGUUUUUC-----  
 AAAUCCUGCGGUCUGGCCGGAAGUCCGAUGACGUCAAGAAGGCCUUCGGCAUCAUUGACCAGGACCAGAGCGACUUCAUUGAG  
 GAGGAGGAGCUGAA-----GCUGUUCUGCAGAA-CUUCAGCGCAAGUG-----  
 CACGCGCUGAGCGAUGCUGAGACAAAGGCUUUCUGAAGGCCGGAGACUCCGACGGGGACGGCAAGAUAGGAGUUGAU  
 >Epinephelus\_bruneus\_JF501970\_-\_parvalbumin\_beta-2\_subunit\_I\_CDS  
 UGAGUCGUGCAGCCUGGACGGAUGCAAAG-----  
 -----ACGUGGCACAUUCGA---CCACAAGAAGUUCUUC-----  
 AAGACAUGCGGCAUGUCUGGCAAGUCCCGACGAUGUCAAGAAGGCCUUCGGCAUCAUUGACCAGGACAAGAGUGGUUUCAUUGAG  
 GAGGAGGAGCUGAA-----GCUGUUCUGCAGAA-CUUCAGGCUGAUG-----  
 CACGUGCGCUGACCGACGCCGAGACCAAGACUUCUCAAAGGCCGGGACACCGACGGUGACGGCAAGAUUGGCGCUGAU  
 >Lates\_calcarifer\_AY688373\_-\_parvalbumin\_beta-2\_CDS  
 UGAUGUCGUGCAGCCUGGAUGGGUGCAAAG-----  
 -----ACGUGGCACUUCGA---CCACAAGAAGUUCUUC-----  
 UCAGCUUGUGGUCUAUCCAACAAGACCUCCGACGAGUUAAGAAGGCCUUCGCCAUCAUUGACCAGGACAAGAGUGGUUUCAUUGAG  
 GAGGAGGAGCUGAA-----GCUGUUCUGCAGAA-CUUCAGGCUGAUG-----  
 CACGCGUGCUGACCGACGUCGAGACCUCGACUUCUCAAAGGCCGGUGACACCGACGGUGACGGCAAGAUUGGCGCUGAC  
 >Katsuwonius\_pelamis\_AB375265  
 UGAGGUCGUGCAGCCUGGAUGCAUGCAAAG-----  
 -----ACGUGGUUCAUUCGA---CCACAAGAAGUUUUUC-----  
 CACUCCUGUGGUCUGUCCGGCAAGUCCGCCGAUGACGUCAAGAAGGCCUUCGCCAUCAUUGACCAGGACAAGAGCGGUUUCAUUGAG  
 GAGGAGGAGCUGAA-----GCUGUUCUGCAGAA-CUUCAGGUCAGUG-----  
 CACGCGCUGUCCGACGCCGAGACCAAGGCUUUCUUCUUGGCCGGUGACUCCGACGGUGACGGCAAGAUUGGCGUUGAC  
 >tuna\_BKCK01000006\_parv\_cluster\_3rd\_cDNA  
 TGAGATCGCTGCAGCCCTGGATGCGTGCAAAG-----  
 -----ACGCTGGTACATTCTGA---CCACAAGAAGTTCTTC-----  
 CACTCCTGCGGTCTGTCCGGCAAGTCTCCGATGACGTCAAGAAGGCCTTCGCCATCATTGACCAGGATAAGAGCGGTTTCATTGAG

GAGGAGGAGCTGAA-----ACTGTTTCTGCAGAA-CTTCAAGGCAGGTG-----  
 CACGCGCACTGTCCGACGCCGAGACCAAGGCTTTTCTCAAGGCCGGTGACACCGACGGTGACGGCAAGATTGGCGTTGAC  
 >Rastrelliger\_kanagurta\_KX527884  
 UGAGAUACUGCAGCCUGGAUGGGUGCAAAG-----  
 -----CCGAUGGUAGCUUCGA---CCACAAGAAGUUCUUC-----  
 AAGGCAUGCGGUCUGGCCGGUAAAGUCCGGUGACGACGUCAAGAAGGCCUUCGCCAUCAUUGACCAGGACAAGAGCGGUUCAUUGAG  
 GAGGAAGAGCUGAA-----GCUGUUCUGCAGAA-CUUCAAGGCAGGUG-----  
 CACGCACACUGUCCGACGCCGAGACCAAGGCUUCCUCAAGGCCGGUGACACCGACGGUGACGGCAAGAUCGGCGUUGAU  
 >Scomber\_japonicus\_EF016113\_-\_parvalbumin\_CDS  
 TGAGGTCACTGCAGCCCTGGATGGGTGCAAAG-----  
 -----CCGCTGGTAGTTTCGA---CCACAAAAAGTTCTTC-----  
 AAGGCATGCGGTCTGTCCGGCAAGTCCACCGATGAAGTCAAGAAGGCTTTCGCCATCATTGACCAGGACAAGAGCGGCTTCATTGAG  
 GAGGAGGAGCTGAA-----GCTGTTCTGCAGAA-CTTCAAGGCAGGTG-----  
 CACGCGCACTCTCCGACGCCGAGACCAAGGCTTTCCTCAAGGCCGGTGACAGCGACGGTGATGGCAAGATCGGTATTGAT  
 >Trachurus\_japonicus\_AB211365\_-\_aji-DPA\_CDS  
 UGACGUCACUGCAGCCUGGACGGGUGCAA-----  
 -----AGUGCAUUCGA---CCACAAGGCAUUCUUC-----  
 AAAGCCUGCGGUCUGGCCGCCAAGUCCGCCGACGACAUCAAGAAGGCCUUCGCAAUCAUGACCAGGACAAGAGCGGCUUCAUUGAG  
 GAGGAUGAGCUGAA-----GCUGUUCUGCAGAA-CUUCUGCGCAGGUG-----  
 CACGCGCACUGUCCGACGCCGAGACCAAGGCUUCCUCAAGGCCGGUGACGGAUGGUGACGGCAAGAUUGGAGUUGAU  
 >NeoBri\_NW\_006272021\_extraction\_-\_LOC102780780\_CDS  
 TAACATCACTTCAGCCCTGGATGCGTGCAAAG-----  
 -----ACGCCGGCACATTCTGA---ACACAAGAAGTTCTTC-----  
 AAGTCCTGCGGCCTTCATGACAAGTCCGCAGATGACATCAAGAAGGCCCTTCGCCATCATTGACCAGGACAAGAGCGGTTTCATTGAG  
 GAGGACGAGCTTAA-----GCTGTTCTCCAGAA-CTTCAAGTCAGATG-----  
 CACGCGTCTGAACGACGCCGAGACCAAGGCTTTCCTCGGTGCCGGTGACACTGACGGTGACGGCAAGATTGGCGCTGAT  
 >Tilapia\_NC\_031969\_02\_LOC100692640\_parvalbumin\_beta  
 TGACATCGCTGCAGCCCTGGATGCGTCCAAAG-----  
 -----ACGCTGGCACATTCTGA---TCACAAGAAGTTCTTC-----  
 AAGTCCTGCGGCCTTCATGGCAAGTCCGCAGATGACATCAAGAAGGCCCTTCGCCATCATTGACCAGGACAAGAGCGGTTTCATTGAG  
 GAGGACGAGCTTAA-----GCTGTTCTCCAGAA-CTTCAAGTCAGGGG-----  
 CACGCGTCTGAACGACGCCGAGACCAAGGCTTTCCTCGGTGCCGGTGACACCGACGGTGACGGCAAGATTGGCGCTGAT  
 >Sparus\_aurata\_NC\_044209\_3rd\_LOC115574776  
 TGACGTCGCTGCAGCCCTGGACGGGTGCAAAG-----  
 -----ACGCTGGATCATTCTGA---CCACAAGAAGTTCTTC-----  
 GCCGCCTGCGGGCTGTCCAAAAAGTCCGGCGACGACGTGAAGAAGGCCCTTTCGCCATCATTGACCAGGACAAGAGTGGTTTCATTGAG  
 GAGGAGGAGCTCAA-----GCTGTTCTGCAGAA-CTTCAAGGCAGGTG-----  
 CACGCGCACTGACAGACGATGAGACCAAGAAATTCCTCAAGGCCGGAGACACCGACGGTGACGGCAAGATTGGCGTTGAT  
 >Rivulus\_marmoratus\_AY682949\_-\_parvalbumin\_1\_CDS  
 UGACAUACCAAAGCCUGGAUGAGUGCAAAG-----  
 -----GCGCUGACUCAUUCGA---CUACAAGAAGUUCUUC-----  
 AAGACAUGCGGUCUGGCCGAAAGAGCGCGGAUGAUGUCAAGAAGGCCUUCGCCAUCAUUGACCAGGACAAGAGUGGCUUCAUUGAG  
 GAGGAUGAGCUGAA-----GCUGUUCUGCAGAA-CUUCAGUGGAGGUG-----  
 CUCGCGCCCUGACCGACGCUGAGACCAAGGCUUCCUGAAGGCCGGCGACAGCGACGGUGAUGGCAAAAUUGGAGCUGAU

>Campylomormyrus\_compressirostris\_KF860176\_-\_parvalbumin\_isoform\_4a\_CDS

UGACAUYACUAAAGCCCUGGAUGCCUGCAAAG-----  
-----CUGCUGACAGUUUCAG---CCACAAGGCCUUCUU-----  
GAUAUGGUGGGCCUGAARGCCAAGUCNGCCGACGAUGUCAAGAAGGCCUUCAAAGCUCUGGAUCAGGACAAGAGYGGCUUCAUUGAG  
GAGGAAGAGCUGAA-----GCUGUUUCUGCAGGG-CUUCAGCGGAGGUG-----  
CCCUGGCACUGACCGACGGUGAGACCAAGGUUUUCCUCAAAAGCCGGUGACAGCGACGGAGAUGGCAAGAUUGGCGCUGAU

>Sardinops\_melanostictus\_AB375262\_-\_Sar\_m\_1\_CDS

GGACAUCACUGCAGCACUGGAGGCCUGCAAAG-----  
-----CUGCUGACUCAUUCGA---CCACAAGGCUUUUUUC-----  
CACAAGGUUGGAAUGUCAGGAAAAUCUGCUGAUGAGCUGAAGAAGUCCUUUGCCAUCAUUGAUCAGGACAAGAGUGGCUUCAUUGAG  
GAGGAGGAGUUGAA-----ACUGUUCUUCAGAA-CUUCUGCAAGAAG-----  
CAAGGGCACUGACUGAUGGCGAGACCAAAAAUUUUUGAAAGCUGGCGACACUGAUGGCGAUGGCAAAAUUGGAAUUGAC

>Gadus\_morhua\_NC\_044065\_2nd\_LOC115531333\_parv

TGACTGCGCCGACCGTCAAGGCTTGCGAAG-----  
-----CTGCTGAGTCCTTCAG---CTACAAGGCTTCTTC-----  
GCCAAGTGCGGCCTGTCCGGCAAGTCCGCTGACGACATCAAGAAGGCTTCTTCGTGATTGACCAGGACAAGAGTGGATTCATTGAG  
GAGGATGAGCTCAA-----GCTCTTCTCCAGGT-CTTCAAGGCTGGAG-----  
CCAGAGCTCTTACAGATGCTGAGACCAAGGCCTTCTGAAAGCCGGTGACAGCGACGGTGATGGTGCTATTGGAGTTGAT

>Gadus\_morhua\_AY035584\_clone1

UGACUGCGCCGACCGCUAAGGCUUGCGAAG-----  
-----CUGCUGAGUCCUUCAG---CUACAAGGCCUUCUUC-----  
GCCAAGUGCGGCCUGUCCGGCAAGUCCGUGACGACAUCAAGAAGGCUUUCUUGUGAUUGACCAGGACAAGAGUGGAUUCAUUGAG  
GAGGAUGAGCUCAA-----GCUCUUCUCCAGGU-CUUCAAGGCUGGAG-----  
CCAGAGCUCUACAGAUGCUGAGACCAAGGCCUUCUGAAAGCCGGUGACAGCGACGGUGAUGGUGCUAUUGGAGUUGAU

>Gallus\_gallus\_OCM\_NC\_052545\_-\_OCM4\_CDS

TGAAATTGCTGCTGGCCTACAGAGTTGCCAAG-----  
-----CTGCTGATTCATTCAA---TTACAAAACCTTTTTT-----  
GTCAAAGTGGGTCTGAACTCCAAGTCCAAGACCAGCTGGCCAAAGTCTTCGGGATTCTCGATCAGGACAGGAGTGGTTTTATTGAG  
GAAGATGAACTGAA-----ACTATTCTGCAGAA-CTTCTCAGCCAGTG-----  
CCAGAGCTCTGACTGATGCTGAGACCAAGGCGTTCCTGGCAGCAGGAGACAGTGATGGAGATGGTAAAATTGGAGTGGAT

>Acipenser\_ruthenus\_PARV\_thymic\_like\_NC\_048337\_1st\_LOC117431613

TGACATCACCGCTGCTCTGAGCGGCTGCCAGG-----  
-----CTGCTGACTCCTTTAA---CTACAAGACCTTCTTCG-----  
GCTGCCGTTGGGCTTCACAAGAAATCCGCGGGTGATATTGCTAAAGTTTTCGGAATCATTGACCAGGATAACAGCGGCTTCATTGAG  
GAGGAAGAGCTGCA-----GCTGTTTCTGCAGAA-CTTCTCAAAGATG-----  
CCAGAGTCTGACAGCTGCTGAGACCAAGGCCTTCCTTGCCGCTGGTGACTCCGACGGTGACGGCAAAATCGGAGTTGAT

>Acipenser\_ruthenus\_PARV\_thymic\_like\_NC\_048335\_1st\_LOC117418243

TGACATCAGCGCTGCTCTGAGCGGCTGCCAGG-----  
-----CTGCTGACTCCTTCAA---CTACAAGACCTTCTTC-----  
GCTGCCGTTGGTCTTGCCAAGAAGTCCGCGGGAGATATTTCTAAGGTTTTCGGAATCATTGACCAGGATAACAGCGGCTTCATTGAA  
GAGGAAGAACTCCA-----ACTGTTTCTGCAGAA-TTTCTCAAAGGCG-----  
CCAGAGCCTGACAGCTGCTGAGACCAAGGCCTTCCTTAGCGCTGGTGATGCCGACGGTGACGGCAAAATCGGAGTTGAT

>Gadus\_morhua\_NC\_044065\_1st\_LOC115531721\_parv

GGACATCACCTCCGCCATCAGCGCTTGCAAAG-----  
-----CGAAAGATTTCGTTAG---TGCAAAGATGTTTTTC-----  
AAAACAGTGGGCTTGTCCAAGAAGACAGCGCCGAGGTGGAGAAAGTTTCAAGATCCTGGACCAAGACAAGAGTGGCTTCATCGAA  
CAAGATGAGCTGCA-----ACTGTTCTGCAGAA-CTTCTCAAAGGAG-----  
CGAGGAATCTGACCGCGCTGAAACCAGGGCGTTCTCTGGCCGGCGACTCTGACGGCGATGGGAAGATCGGCTGGGAA  
>Sparus\_aurata\_NC\_044206\_1st\_LOC115570754  
AGACATCACTTCAGCCATTAACGCTTGTAAG-----  
-----GTAAGGATTCTTCAG---CCCAAGATGTTTTTC-----  
AAAACAGTGGGTTTATCGAAGAAAACCTCCGACAGAGATCGAGGGGTCTTAAAGATTTGGACCAGGACAAGAGCGGCTTCATAGAA  
CAGGATGAGTTACA-----GCTGTTTCTGCAGAA-CTTCTCAAAGGAG-----  
CGAGGACCCTGACGGCCCGAGACCAGAGCTTTCTGCTGGAGGGAGACTCGGATGGAGACGGAAAGATCGGATGGGAA  
>Cyprinus\_carpio\_PARV15\_cluster\_1st\_parv\_thymic\_like\_LOC109050191\_cDNA  
TGATATTTCAACTGCCATCAATGCATGTAAAG-----  
-----CAAAGGATTCTTTCAG---CCCAAAGACATTTTTT-----  
GCAACAGTAGGCTTGTCAAAGAAGTCTCCTCCTGAGATAGAGAAGGTCTTAAATGTTGGACCAGGACAAGAGTGGGTTCATTGAA  
CAGGATGAGCTACA-----GTTGTTTCTGCAGAA-CTTCTCTAAAGGG-----  
CTCGTGCACTAACAGCAGCTGAAACCAAGGCCTTCTCATGGCTGGAGACATGGATGGGGATGGGAAGATCGGCTGGGAA  
>Salmo\_salar\_NC\_027300\_1st\_LOC106609854\_parv  
AGATATTGCTTCAGCTATCAACGCTTGCAGGG-----  
-----CAAACGACTCCTTCAG---CCCAAAGAAGTTTTT-----  
GCGATGGTGGGATTGTCCAAGAAGTCTCCCCCTGAGATTGAGAAGATCTTCATGATCCTGGACCAGGACAAGAGTGGCTACATCGAA  
CAGGACGAGCTACA-----GCTTTTCTCCAGAA-CTTCTCCAAGGGG-----  
CTCGTCCCCTGACAAACGGCTGAGACAAGAGCCTTCTCCTGGCTGGGGACAAGGACGGGAATGGAAAGATAGGCTGGGAC  
>Salmo\_salar\_NC\_027327\_1st\_prvt  
AGATATTACTTCAGCTATCAATGCTTGCAGAG-----  
-----CAAACGACTCCTTCAG---CCCAAAGAAGTTTTT-----  
GCGATGGTGGGCTTGTCCAAGAAGTCTCCTCCTGAGATTGAGAAGATCTTCATGATCCTGGACCAGGACAAGAGTGGCTACATCGAA  
CAGGACGAGCTACA-----GCTTTTCTCCAGAA-CTTCTCCAAGGGG-----  
CTCGTCCCCTGACAGCGCCGAGACCAGAGCCTTTCTCCTAGCTGGGGACAAGGACGGGGACGGAAAGATAGGCTGGGAC  
>Anguilla\_anguilla\_NC\_049202\_-\_LOC118219894\_CDS\_1st  
TGACATAACCTCTGTATCACTGCTTGCCAAG-----  
-----ATGCTGATTCTTTCAA---CCTCAAGGCCTTTTTTC-----  
AGAGATGTGGGTTTGTCTAAGAAGTCACCATTGGATATTGAGAAAGTCTTAAATCCTGGACCAGGACAAGAGTGGCTTTATTGAG  
CACGATGAGCTTCA-----GCTGTTCTTCAGAA-CTTCTCTAAGGGAG-----  
CACGGTCTCTGACAGCTGCAGAGACCAAGGCATTCTCCAGGCAGGGGACATGGATGGGGATGGCAAGATCGGACTGGAA  
>Lepisosteus\_oculatus\_PARV\_beta\_like\_NC\_023191\_-\_LOC102697446  
CGCCGTCGCCGCGGCCCTGACGGCCTGCCAAG-----  
-----CCTAGGCTCCTTCGA---CCACAAGGCGTTCTTC-----  
GCGGCGGTGGGTCTGTCCAAGAAGTCGCCGCGGACGTCGAGAAAGTGTTCAAGGTCCTGGACCAGAAACAGCGGCTTCATCGAG  
GAAGACGAGCTGCA-----GTTGTTTCTGCAGAG-CTTCTCAAAGGAG-----  
CGCGGGTCTGACGGCTGCCGAGACCAGGGCGTTCTGTTGGCCGGAGACTCCGACGGGGACGGGAAAATCGGAGTAGAA  
>Polypterus\_senegalus\_PARV\_thymic\_like\_NC\_053166\_-\_LOC120542892  
GGACATTGCGGCAGCGTTAAATGCTTGTCAAG-----  
-----ATGTCGGCTCCTTCAA---CTACAAGTCTTTCTTC-----

GCCACGGTTGGGCTGTCCAGGAAGTCACCAGCAGATGTCCAAAGAGTCTTTGATATCATTGATCAGGACAGAAGCGGCTTCATCGAA  
 GAAGAGGAGCTGCA-----GTTGTTCTACAAAA-TTTCTCTAAGAACG-----  
 CAAGAGTGCTGACAGTTGCCGAGACCAGAGCTTTCCTCAAAGCCGGTGACTTGGACAACGACGGAAGAACTCGGGGCAGAA  
 >Esox\_lucius\_NC\_025978\_2nd\_LOC105013010\_parv  
 TGACATCAAAACTGCATTGGAAGCATGCAAAG-----  
 -----CCCCCGAGTCTTTCAA---CTTTACTGCCTTCTTC-----  
 AAAGCAGTTGGCTTTGCCAGCAAGACCGCTGATGAGGTCAAGAAGGCCCTTCAGGTCATTGATCAGGATGCAAGTGGCTTTATTGAG  
 GAGGAGGAACTGAA-----GTTGTTCTTCAGAA-CTTCTGCCCCAATG-----  
 CCAGGACACTGACTGACGCTGAGACAAAGGCTTTCCTCAAGGCTGGTGATGTGGATGGTGATGGCATGATTGGAATTGAT  
 >Salmo\_salar\_NC\_027302\_1st\_LOC106601825  
 TGACATCAAAACCGCATTGGAAGCGTGCAAAG-----  
 -----CCGCCGACACCTTCAA---CTTCAAGACCTTCTTC-----  
 CACACGATTGGCTTTGCCTCGAAGTCCGCCGACGACGTCAAGAAGGCTTTCAAGGTCATTGACCAGGATGCAAGTGGCTTTATTGAG  
 GTGGAGGAGCTGAA-----GCTGTTCTTCAGAA-CTTTTGCCCCAAGG-----  
 CCAGGGAACCTTACCGATGCAGAGACAAAGGCTTTCCTCAAGGCTGGTGATGCCGATGGTGATGGCATGATTGGAATTGAT  
 >Salmo\_salar\_NC\_027302\_3rd\_LOC106601823  
 TGACATCAAAACCGCATTGGAAGCGTGCAAAG-----  
 -----CCGCCGACACCTTCAA---CTTCAAGACCTTCTTC-----  
 CACACGATTGGCTTTGCCTCGAAGTCCGCCGACGACGTCAAGAAGGCTTTCAAGGTCATTGACCAGGATGCAAGTGGCTTTATTGAG  
 GTGGAGGAGCTGAA-----GCTGTTCTTCAGAA-CTTTTGCCCCAAGG-----  
 CCAGGGAACCTTACCGATGCAGAGACAAAGGCTTTCCTCAAGGCTGGTGATGCCGATGGTGATGGCATGATTGGAATTGAT  
 >Salmo\_salar\_NC\_027302\_4th\_aftergap\_LOC106601787  
 TGACATCAAAACCGCATTGGAAGCGTGCAAAG-----  
 -----CCGCCGACACCTTCAA---CTTCAAGACCTTCTTC-----  
 CACACGATTGGCTTTGCCTCGAAGTCCGCCGACGACGTCAAGAAGGCTTTCAAGGTCATTGACCAGGATGCAAGTGGCTTTATTGAG  
 GTGGAGGAGCTGAA-----GCTGTTCTTCAGAA-CTTTTGCCCCAAGG-----  
 CCAGGGAACCTTACCGATGCAGAGACAAAGGCTTTCCTCAAGGCTGGTGATGCCGATGGTGATGGCATGATTGGAATTGAT  
 >Salmo\_salar\_NC\_027305\_2nd\_LOC100137051  
 TGACATCAAAACCGCATTGGAAGCATGCAAAG-----  
 -----CCGCCGACACCTTCAA---CTTCAAGACCTTCTTC-----  
 CACACGATTGGCTTTGCCTCGAAGTCCGCCGACGACGTCAAGAAGGCTTTCAAGGTCATTGACCAGGATGCAAGTGGCTTTATTGAG  
 GTGGAGGAGCTGAA-----GCTGTTCTTCAGAA-CTTTTGCCCCAAGG-----  
 CCAGGGAACCTTACCGATGCAGAGACAAAGGCTTTCCTCAAGGCTGGTGATGCCGATGGTGATGGCATGATTGGAATTGAT  
 >Salmo\_salar\_NC\_027305\_4th\_LOC106606665  
 TGACATCAAAACCGCATTGGAAGCATGCAAAG-----  
 -----CCGCCGACACCTTCAA---CTTCAAGACCTTCTTC-----  
 CACACGATTGGCTTTGCCTCGAAGTCCGCCGACGACGTCAAGAAGGCTTTCAAGGTCATTGACCAGGATGCAAGTGGCTTTATTGAG  
 GTGGAGGAGCTGAA-----GCTGTTCTTCAGAA-CTTTTGCCCCAAGG-----  
 CCAGGGAACCTTACCGATGCAGAGACAAAGGCTTTCCTCAAGGCTGGTGATGCCGATGGTGATGGCATGATTGGAATTGAT  
 >Gallus\_gallus\_OCM\_NC\_052545\_-\_OCM3\_CDS  
 AGATATTGAATCTGCTCTCTCCAGCTGCCAGG-----  
 -----CTGCGGATTCTTCAA---TTATAAGTCTTTCTTC-----  
 TCCACGGTGGGCTTATCCAGCAAAACTCCTGATCAGATAAAGAAAGTTTTTGAATCCTTGATCAGGACAAGAGCGGCTTCATTGAA

GAAGAAGAGCTTCA-----GCTGTTTCTGAAGAA-CTTCTCTTCGAGTG-----  
CCAGAGTCCTCACCTCTGCGGAGACCAAAGCTTTCCTGGCTGCAGGTGACACCGACGGCGACGGCAAAATTGGAGTAGAA  
>Xenopus\_laevis\_OCM\_NC\_030685\_-\_ocm3\_CDS  
GGACATCGACGCTGCCTTGAGCAGTGTTTCAG-----  
-----CTGCCGAGTCATTTCA---GCACAAGTCCTTCTTC-----  
GACAAATGTGGTCTGACAGGCAAATCCAATGACCAAGTCAGGAAGGTCTTTGAAATCCTTGACAGAGACAAGAGTGGATTATTGAG  
GAAGATGAACTCCA-----GCTCTTCCTGCAGAA-CTTTAAGTCTAATG-----  
CCAGAGCTCTCAGTGCTGCAGAGACCAAGGCTTTTCTGAAAGCTGGTGACTCTGATGGTGACGGCAAGATTGGAGTAGAT  
>Xenopus\_laevis\_PARV\_1.S\_NC\_030741\_-\_pvalb.1.S\_CDS  
GGACATTGACGCTGCTCTGAGCAGTGTTTCAG-----  
-----CTGCCGAGTCATTTCA---GCACAAGACCTTCTTC-----  
AGCAAAGTTGGTCTGGCAGGCAAAACCAATGATCAAGTCAAGAAGGTCTTTGAAATCATTGACAGAGACAAGAGTGGATTATTGAG  
GAGGATGAACTCCA-----GCTCTTCCTGCAGAA-CTTTAAGTCTAATG-----  
CCAGAGCTCTCAGTGCTGCAGAGACCAAGGCTTTTCTGAAAGCTGGTGACTCTGATGGTGATGGCAAGATCGGAGTCGAT  
>Anguilla\_anguilla\_NC\_049217\_-\_LOC118216236\_CDS\_1st  
GGACATCAAGGCTGCGGTGCTGGCGTGTGAAG-----  
-----CTCCAGGCACATTTGA---TTATAAGTTGTTCTTC-----  
ACTCAAGTGGGTCTGTTGAGCCAGCAGGACGTGGAGGGAAAGACGGTGTTAATGTCTGGACCGAGACCAGAGTGGCTTCATCGAA  
GAAGCGGAACTGAA-----GTTTTCTCCTGCAGAA-TTCTGCTTGGGAG-----  
CCAGGGAGCTAACTGAGGCAGAGACCAAGGCTTTCATAAGTGCTGTGGATAGAGATGGCGATGGAAAGATTGGGGTTGAA  
>Anoplopoma\_fimbria\_BT082747\_-\_PRVB\_CDS  
GGACAUCAAGGUGCAGUUCAGGCUUGUCAAG-----  
-----UCCAGGCACAUUCGA---CUUCAAGUCGUUCUUU-----  
GCACAUGUGGGACUGUCCAGCUCAUCUGAGGCAGAUAGAAUAAAGUGUUUACAGUCUUGGACCAAGACAAGAGUGGAUACAUUGAG  
GAGGAGGAGCUCAA-----GCUGUUCCUUCAGAA-UUUCUCUCCGGGGG-----  
CGAGGGAGCUGACUUUGGUGAGACCAAGGCUCUGAUGGCUGCUGUCGAUAAGGAUGGUGAUGGCAAGAUUGGGAGAGAA  
>tuna\_BKCK01000006\_parv\_cluster\_1st\_cDNA  
GGACATCAAGACTGCGGTCCAGGCTTGTCAG-----  
-----CTCCAGGCACATTCAA---CCACAAGTCATTCTTT-----  
GCGCAAGTGGGACTGGCCAGCTTATCTGAAGTAGAGGGGAGAAAAGTGTTTACAGTCCTGGACCAGGACAAGAGTGGATACATTGAG  
GAGGAGGAGCTAAA-----GCGGTTCTTCAGAA-TTCTCTCCAGGG-----  
CGAGGGAGCTGACTGTGGCTGAGACCAAGGCTCTGATGGCTGCAGGAGATAAGATGGTGATGGCAAGATTGGGATGGAA  
>NeoBri\_NW\_006272021\_extraction\_-\_LOC102780222\_CDS  
GGACATACAGGCTGCGGTCCAGGCTTGTCAG-----  
-----CTCCAGGCACATTCAA---CTTCAAGTCATTCTTT-----  
GAACAAGTTGGACTGACTGGCTTATCTGAAGCAGACAGGAGAAAAGTGTTTACAGTCCTGGACCAAGACAAGAGTGGATACATCGAA  
GAGGAGGAGCTCAA-----ACTATTTCTTCAGAA-TTCTCTCCAGGG-----  
CCAGAGAGCTGACTGTGGCTGAAACCAAAGCTCTGATGGCGTCTGGGGATAAAGACGGTGATGGCAAGATTGGAATAGAA  
>Tilapia\_NC\_031969\_04\_LOC100693182\_parvalbumin\_beta  
GGACATACAGGCTGCGGTCCAGGCTTGTCAG-----  
-----CTCCAGGCACATTCAA---CTTCAAGTCATTCTTT-----  
GAACAAGTTGGACTGACTGGCTTATCTGAAGCAGACAGGAGAAAAGTGTTTACAGTCCTGGACCAAGACAAGAGCGGATACATCGAA  
GAGGAGGAGCTCAA-----ACTATTTCTTCAGAA-TTCTCTCCGGGG-----  
CCAGAGAGCTGACTGTGGCTGAAACCAAAGCTCTGATGGCTGCTGGGGATAAAGACAGTGATGGCAAGATTGGAATAGAA

>Sparus\_aurata\_NC\_044209\_1st\_LOC115575577

GGACGTCAAGGCTGCGGTCCAGGCTTGTCAA-----  
-----CCCCAGGCACATTCTGA---CTTCAAGACATTCTTT-----  
GCACGAGTGGGACTGACCGGCTCTCTGAGGCAGATGGGAAAAGAGTGTTCATAATTCTGGACCAAGACAGGAGTGGCTACATCGAG  
GAGGAGGAGCTCAA-----GCTGTTCTGCAGAA-TTTCTCTCCGGAGG-----  
CGAGGGAGCTGACCGTGGCTGAGACCAAGGCTCTGATGGCCGCCGGCGATAAAGACGGGGACGGCAAGATCGGGCTGGAA

>Salmo\_salar\_NC\_027302\_5th\_LOC106601789

GGACATCAGGGCTGCTGTCAAGGCTTGTCAAG-----  
-----CTCCAAGCACATTCAA---CTTCAAGTTGTTCTTT-----  
GCACAAGTGGGACTGACCGCAAGCCAGAGGCAGAGGGCCAACGAGTGTTCAGAGTCTCTGGACCAAGACCAGAGTGGATACATAGAG  
GAGGAGGAGCTGAA-----ATTATTCCTGCAGAA-CTTCTCCTCAGGGG-----  
CCAGGGAGCTGACTGATGCTGAGACCAGAACTCTCCTAGCGGCAGGAGACAGAGATGGGGATGGCAAGATAGGGATGGAA

>Salmo\_salar\_NC\_027305\_1st\_LOC106606661

-----CTCCAGGCACATTCAA---CTTCAAGTTGTTCTTT-----  
GCACAAGTGGGACTGACCGAAAGCCAGAGGCAGAGGGCCAACGGGTGTTCAGAGTCTCTGGACCAAGACCAGAGTGGATACATAGAG  
GAGGAGGAGCTGAA-----ATTATTCCTGCAGAA-CTTCTCCTCAGGGG-----  
CCAGGGAGTTGACTGATGCTGAGACCAGAACTCTCCTAGCGGCAGGAGACAGAGATGGGGATGGCAAGATAGGGATGGAA

>Cyprinus\_carpio\_PARV02\_cluster\_1st\_parv\_betallike\_LOC109096495\_cDNA

-----CCCCAGGGACTTTCAA---CTACATGATGTTCTTT-----  
GAACACGTGGGGCTGATAGGTAAAGCTACTTCAACTGGGGAGAAGGTGTTCAGGCCCTGGACCA-  
GACAAGAGTGGATTATTGAAAAAGGGGAGCTGAA-----ACGCTTCCTCCAGAA-CTTCTGCTCAAAGG-----  
CCAGAGAGCTCACAGAGGCCGAGACCAAACTCTGTTGGCAGCTGGGGACAGTGTGGAGATGGCAAAATTGGGATGGAA

>Cyprinus\_carpio\_PARV06\_cluster\_5th\_parv\_betallike\_LOC109096491\_cDNA

GGATATGCAACATGTTGCACCGACCCGTGAACATCC-----  
-----CCCCAGGGACTTTCAA---CTACCAGACGTTCTTT-----  
GAACATGTGGGCCTGATAGGTAAAGCTGCTTCAGATGGGGAGAAGGTGTTCAGGCCCTGGACCAGGACAAGAGTGGATTCATTGAA  
AAAGAGGAGCTGAA-----ACGCTTCCTCCAGAA-CTTCTGCCCCAAGG-----  
CCAGAGAGCTCACAGAGGCCGAGACCAAACTCTCCTGGCAGCTGGCGACGGTGATGGAGACGGCAAAATCGGCATGGAA

>Cyprinus\_carpio\_PARV14\_3like\_iso2a\_LOC109087200\_cDNA

TAATATTCTATTTTGTATTATCATATTTTGTGCGTTCAG-----  
-----CCCCAGGGACTTTCAA---CTACCAGACGTTCTTT-----  
GAACATGTGGGCCTGATAGGTAAAGCTGCTTCAGATGGGGAGAAGGTGTTCAGGCCCTGGACCAGGACAAGAGTGGATTCATTGAA  
AAAGAGGAGCTGAA-----ACGCTTCCTCCAGAA-CTTCTGCCCCAAGG-----  
CCAGAGAGCTCACAGAGGCCGAGACCAAACTCTCCTGGCAGCTGGCGACGGTGATGGAGACGGCAAAATCGGCATGGAA

>Cyprinus\_carpio\_PARV14\_3like\_iso2a\_nostopcodon\_cDNA\_identical\_to\_NW017545308

TAATATTCTATTTTGTATTATCATATTTTGTGCGTTCAG-----  
-----CCCCAGGGACTTTCAA---CTACCAGACGTTCTTT-----  
GAACATGTGGGCCTGATAGGTAAAGCTGCTTCAGATGGGGAGAAGGTGTTCAGGCCCTGGACCAGGACAAGAGTGGATTCATTGAA  
AAAGAGGAGCTGAA-----ACGCTTCCTCCAGAA-CTTCTGCCCCAAGG-----  
CCAGAGAGCTCACAGAGGCCGAGACCAAACTCTCCTGGCAGCTGGCGACGGTGATGGAGACGGCAAAATCGGCATGGAA

>Danio\_rerio\_NC\_007114\_-\_pvalb5\_CDS

CGACATCGCAGCAGCCATGCAGGCTTGTC AAG-----  
-----CGCAAGGATCTTTCAA---CCACGAGTCGTTCTTT-----  
GAACAAGTG GGTCTGATCGGTAGAGCCTCTTCAGACGGGAGAAGGTGTTCAAGGCCCTGGACCAGGACAAGAGCGGATACATCGAA  
AAAGAGGAGCTGAA-----ACGCTTCCTCCAGAA-CTTCTGCTCGAAGG-----  
CCAGAGAGCTCACAGAGGCCGAGACCAACACTCTTCTGGCAGCCGGAGACAAAGATGGAGATGGAAAAATTGGGATCGAA  
>Polypterus\_senegalus\_NC\_053163\_LOC120536197\_parv  
AGATATTGAAACAGCCATAGAAACTTGCCAGG-----  
-----CTCCTGACACATTTGA---CCACAAGGCTTTCTTT-----  
GCCCAGGTGGGTCTGACTACCAAACCTGCTGAAGAACTGAAGAAAATCTTTGCTGTCTGGATCAGGATAAGAGTGGCTACATCGAG  
GAGACCGAACTCAA-----ATTTTTCCTGCAGAA-CTTTCAAGCTGGAG-----  
CCAGAGTTCTGACTGACAAAGAGAACAAGACTCTTGTGACTGCGGGAGATGCTGACGCTGATGGAAAAATGGGACCCGAT  
>Polypterus\_senegalus\_NC\_053163\_LOC120536869\_parv  
TGATATTAAGGCAGCAGTGCAGGCGTTCCAAG-----  
-----CACCCGACTCTTTTGA---TCACAAGGCTTTCTTC-----  
TCGAAGGTTGGTATGACTGACAAATCACCTGATGACGTGAAGAAAATTTTCGCTATTCTGGATCAGGACAAGAGCGGCTTCATCGAG  
GAGGCGGAACTGAA-----GTTTTTCATGCAAAA-CTTTGAGGCTGGAG-----  
CTCGTGTCTGACCGAAAAGGAGAACAAGGCTCTGCTGGCCGCAATCGATAAGGATGGTGACGGCAAAATCGGCTGTGAA  
>Esox\_lucius\_NC\_025976\_LOC105012079\_parv  
TGATATCAAGAAGGCTCTTGATGCCGTCAAAG-----  
-----CCGAGGGCTCCTTCGA---TCATAAGAAGTTCTTT-----  
GCTCTGGTGGTCTGAAGGCCATGTCTGCTGATAATGTCAAGAAGGTGTTCAAGGCCATTGATGCTGATGCAAGTGGCTTCATTGAG  
GAGGAGGAGCTCAA-----GTTTGTACTCAAGAG-CTTCGCTGCGGACG-----  
GCAGAGACCTGACCGACGCGGAGACCAAAGCATTCTCAAGGCCGCCGACAAGGATGGAGATGGCAAGATCGGCATCGAC  
>Salmo\_salar\_NC\_027301\_LOC106591443\_parv  
TGATATTCAGAAGGCCCTTGATGCAGTCAAAG-----  
-----CGGAGGGTTCCTTCGA---CCATAAGAAGTTCTTT-----  
GCTCTGGTGGGCCTGAAGGCCATGACTCCCGACAACGTCAAGAAGGTGTTCCAGGCTATTGATGCTGACCAGAGTGGATTCAATTGAG  
GAGGAGGAGCTCAA-----GTTTGTGCTGAAGAG-TTTCGCTGAGGACG-----  
GCAGAGACCTGACCGACGCCGAGACCAAAGCCTTCCTTAATGCCGCCGACAAGGACGGTGATGGAAAAGATTGGCATCGAC  
>Salmo\_salar\_NC\_027311\_LOC106564386\_parv  
TGATATTCAGAAGGCCCTTGATGCAGTCAAAG-----  
-----CGGAGGGTTCCTTCGA---CCATAAGAAGTTCTTT-----  
GCTCTGGTGGGCCTGAAGGCCATGACTCCCGACAACGTCAAGAAGGTGTTCCAGGCTATTGATGCTGACCAGAGTGGATTCAATTGAG  
GAGGAGGAGCTCAA-----GTTTGTGCTGAAGAG-TTTCGCTGAGGACG-----  
GCAGAGACCTGACCGACGCCGAGACCAAAGCCTTCCTTAATGCCGCCGACAAGGACGGTGATGGAAAAGATTGGCATCGAC  
>Cyprinus\_carpio\_PARV13\_parv7like\_iso4a\_LOC109100551\_cDNA  
TGATATCAAGAAAGCCCTTGATCAGTTCAAAG-----  
-----CTGTGGACAGCTTCGA---CCACAAGAAGTTTTTT-----  
GACGTGGTGGGACTGAAGGCTCTGTCTGCTGAAAACGTGAAGTTGGTCTTCAAAGCTCTGGACGTGGACGCCAGTGGCTTCATCGAG  
GAAGAGGAGCTAAA-----GTTTGTGCTGAAGGG-CTTTTCTGCAGATG-----  
GCAGAGATCTCACTGATAATGAGACCAAAGCATTCTCACTGCTGCTGACAAGGATGGAGATGGGAAAATTGGCATAGAT  
>Cyprinus\_carpio\_PARV19\_7\_isoX3\_2isomorphs\_LOC109063140\_longer\_cDNA  
TGATATCAAGAAAGCCATTGACCAGTTCAATG-----  
-----CTGCAGACAGCTTCGA---CCACAAGAAGTTCTTT-----

GACGTGGTGGGACTGAAGGCTCTGTCTGCAGAAAACGTGAAGTTGGTCTTCAAAGCTCTGGATGTGGATGCCAGCGGCTTCATTGAG  
GAGGAGGAGCTAAA-----GTTTGTGCTGAAGGG-CTTTTCTGCAGATG-----  
GCAGAGATCTCACCGATAAGGAGACCAAAGCATTCTCGTGCTGCCGACAAGGATGGAGATGGGAAAATTGGCATAGAT  
>Danio\_rerio\_NC\_007133\_-\_pvalb7\_CDS  
CGATATCAAGAAAGCCCTTGATCAATTCAAAG-----  
-----CTGCTGACAGTTTCGA---CCACAAGAAGTTCTTC-----  
GATGTGGTGGGACTGAAGGCTCTGTCTGCTGACAACGTGAAGTTGGTCTTCAAAGCTCTGGATGTGGACGCCAGCGGCTTCATCGAG  
GAGGAAGAGCTTAA-----GTTTGTGCTGAAGGG-CTTTTCTGCAGATG-----  
GCAGAGATCTTACCATAAGGAGACCAAAGCATTCTCGTGCTGCTGATAAGGATGGAGATGGAAAAATTGGCATAGAT  
>NeoBri\_NW\_006272110\_extraction\_-\_LOC102781695\_CDS  
GGAGATCAAGAAAGCTCTTGATGCCTTC---G-----  
-----CAGCAGAAACATTTGA---CCCTAAAAAGTTCTTT-----  
GAAATGGTGGGAATGAAGGCCATGTGGCTGAAAACGTCAAGAAGGTCTTTCAGGTTCTGGATGTGGATGGTAGCGGATTATAGAA  
GAAGAAGAGCTAAA-----GTTTGTACTGAAGGG-CTTTTCCAAGGATG-----  
GCAGAGATCTGACTGACGCTGAGACTAAAGCATTCTCACAGCTGCAGACAAAGATGGAGATGGCAAGATCGGCATTGAT  
>Tilapia\_NC\_031971\_LOC100710987\_parvalbumin\_7\_isoform\_X1  
GGAGATCAAGAAAGCTCTTGATGCCTTC---G-----  
-----CAGCAGAAACATTTGA---CCCTAAAAAGTTCTTT-----  
GAAATGGTGGGAATGAAGGCCATGTGGCTGAAAACGTCAAGAAGGTCTTTCAGGTTCTGGATGTGGATGGTAGTGGATTATAGAA  
GAAGAAGAGCTAAA-----GTTTGTACTGAAGGG-CTTTTCCAAGGATG-----  
GCAGAGATCTGACTGACGCTGAGACTAAAGCATTCTCACAGCTGCAGACAAAGATGGAGATGGCAAGATCGGCATTGAT  
>tuna\_BKCK01000006\_parv\_placed\_alone\_cDNA  
GGAGATCAAGAAAGCTCTTGATGCCTTT---G-----  
-----CAGCAGAAACATTCGA---CCCTAAAAAGTTCTTT-----  
GAAATGGTGGGAATGAAGGCCATGTCTGCCGAAAACGTCAAGAAGGTCTTCCAGGTTCTGGATGTGGACGGTAGTGGATTCATAGAA  
GAGGGCGAGCTCAA-----GTTTGTACTGAAGGG-CTTTTCCCAGGAGG-----  
GCAGAGATCTGACTGACGCCGAGACATCAGCATTCTTAAAGCTGCAGACAAAGATGGAGACGGAAAAATCGGCATTGAC  
>Sparus\_aurata\_NC\_044187\_LOC115581494\_parv7  
GGAGATCAAGAAAGCTCTTGATGCCTTT---G-----  
-----CAGCAGAAACATTCGA---CCCCAAAAAGTTCTTC-----  
GAGATGGTGGGATTGAAGGCCATGACAGCTGAAAACGTCAAGAGGTCTTCAAGGTTCTGGACGTGGACGGTAGCGGCTTCATAGAG  
GAGGAAGAACTCAA-----GTATGTACTGAAGGG-CTTTTCCCAGGAGG-----  
GCAGAGATCTGACTGACGACGAGACAAGAGCATTCTCAAAGCCGAGACAAAGACGGAGATGGCAAGATCGGGATTGAC  
>Esox\_lucius\_NC\_025978\_1st\_LOC105031166\_parv  
CGACATCAAGAAAGCCCTAGATGCATTGCAG-----  
-----CGGAGGGGTCGTTTGA---CCATAAGAAGTTTTTC-----  
GAGATGGTTGGTCTGAAGGCCAAGTCCGCTGAGGATGTGAAGAAAGCCTTCTGGTGTGGACGCAGACGCCAGCGGATTCATAGAG  
GAGGAGGAGCTCAA-----GTTTGTCTGAAGGG-ATTTGCCTCAGACG-----  
GCAGAGATCTGACCGACAAAGAAACCAAAGCATTTTTAAACGAAGCTGACAAGGATGGAGACGGCATGATCGGCATTGAC  
>Salmo\_salar\_NC\_027302\_6th\_aftergap\_prva  
CGATATCAAGAAAGCCCTAGACGCATTTCAG-----  
-----CGGCTGACTCGTTTGA---CCATAAGAAGTTCTTT-----  
GAGATGGTGGTCTGAAGGCCAAGTCCGCTGAGGATGTGAAGAAAGCCTTCTGGTGTGGACGCAGACGCCAGCGGATTCATAGAG

GAGGAGGAGCTCAA-----GTTCTGACTGAAGGG-ATTTGCCTCAGACG-----  
 GCAGGGACCTGACCGACAAAGAAACCAAAGCGTTCTTAAACGAAGCCGACAAGGACGGAGACGGCATGATCGGCATCGAG  
 >Salmo\_salar\_NC\_027305\_6th\_aftergap\_LOC106607439  
 CGACATCAAGAAAGCCCTAGAGGCATTTCGACG-----  
 -----CGGCTGACTCTTTTGA---CCATAAGAAATTCTTT-----  
 GAGATGGTGGGTCTGAAGGCCAAGTCAGCTGAGGATGTGAAGAAAGCCTTCCTGGTGTGGACGCTGACGCCAGCGGATTCATAGAG  
 GAGGAGGAGCTCAA-----GTTTGTACTGAAGGG-ATTTGCCTCAGACG-----  
 GCAGGGACCTGACCGACAAAGAAACCAAAGCATTCTTAAACGAAGCTGACAAGGATGGAGACGGCATGATCGGCATCGAG  
 >NeoBri\_NW\_006272055\_extraction\_-\_LOC102791720\_CDS  
 TGACATCAAGAAAGCTCTAGATGCATTTGCAG-----  
 -----TTGCTGACTCTTTTGA---CCACAAGAAGTTTTTT-----  
 GAGCTGGTGGGTCTGAAGTCCAAGTCTGCCGACGATGTGAAGAAGGTCTTCACGGTGTGGACGCGGACAACAGCGGCTTCATAGAG  
 GAGGAAGAACTCAA-----ATTCGTCTCTGAAGGG-CTTTGCCAAAGATG-----  
 GCAGAGACCTGACAGACAAAGAAACCAAAGCATTTTTAAAGCAGCTGACAAGGATGGAGACGGCAAGATTGGAGTCGAT  
 >Tilapia\_NC\_031969\_05\_LOC100701083\_parvalbumin\_7  
 TGACATCAAGAAAGCTCTAGATGCATTTGCAG-----  
 -----TTGCTGATTCTTTTGA---CCATAAGAAGTTTTTT-----  
 GAGATGGTGGGTCTGAAGTCCAAGTCTGCCGACGATGTGAAGAAGGTCTTCACGGTGTGGACGCGGACAACAGCGGCTTCATAGAG  
 GAGGAAGAACTCAA-----ATTCGTCTCTGAAGGG-CTTTGCCAAAGATG-----  
 GCAGGGACCTGACAGACAAAGAAACCAAAGCATTTTTAAAGCAGCTGACAAGGATGGAGACGGCAAGATTGGAGTCGAT  
 >tuna\_BKCK01000027\_parv\_cDNA  
 TGACATCAAGAAAGCTCTGGATGCATTTGCAG-----  
 -----TTGCTGACTCTTTTGA---TCATAGGAAGTTTTTT-----  
 GAGATGATCGGTCTGAAGGCCAAGTCTTCTGATGATGTGAAGAAGGTCTTCACGGTGTGGACGCCGACAACAGCGGCTTCATAGAG  
 GAGGAGGAGCTCAA-----ATTCGTCTCTGAAGGG-TTTTGCCAAAGATG-----  
 GCAGGGACCTGACAGACAAAGAAACCAAAGCATTTTTAAAGCAGCCGACAAGGATGGAGATGGCAAGATTGGAATCGAT  
 >Sparus\_aurata\_NC\_044209\_5th\_afterbreak\_LOC115576380  
 TGACATCAAGAAAGCTCTAGATGCATTTGCAG-----  
 -----CTGCAGACTCCTTTGA---TTATAGGAAGTTTTTC-----  
 GACATGGTGGGTCTGAAGGCCAAGTCTTCTGACGACGTGAAGAAGGTTTCAAGGTGTGGACGCCGACAACAGCGGCTTCATAGAG  
 GAGGAGGAGCTCAA-----ATTCGTCTCTGAAGGG-TTTCGCCAAAGATG-----  
 GCCGGGACCTGACGGACAAAGAAACCAAAGCATTTTTAAACGAGCCGACAAGGATGGAGACGGCAAGATTGGAGTCGAT  
 >Anguilla\_anguilla\_NC\_049202\_-\_pvalb7\_CDS\_4th\_after\_break  
 TGAGATCAAGAAGGCCCTTGATGCTTTCAAAG-----  
 -----CTGCAGAGTCCTTCAA---CCATATGAAGTTTTTT-----  
 GAGATGATTGGTCTTAAAGCGAAGTCAGCTGAAGATGTGAAGAAGGTTTCAAAGTTCTCGATGTGGACAACAGCGGCTTCATTGAG  
 GAGGAGGAACTCAA-----ATTCGTCTCTGAAAGG-TTTCGCCTCCGACG-----  
 GCAGGGACCTCACAGACAAAGAGACCAAAGCGTTCTGGAGGCGGCAGACAGGGATGGAGACGGGAAAATCGGGGTCGAC  
 >Paramormyrops\_kingsleyae\_PARV\_7like\_NW\_019712022\_-\_LOC111845247\_CDS  
 AGACATTAAGAAGGCTCTGGATGCCTTCAAG-----  
 -----CTGCCGATACCTTTGA---CCCTCTGAAGTTCTTC-----  
 GACATGGTGGGTCTGAAGGCCAAGTCATCTGAGGACGTGAAGAAGGCCTTCAAAGCTCTGGACGTGGACAACAGCGGCTTCATCGAG  
 GAGGAGGAGCTGAA-----GTTCTGTCTGAAAGG-TTTCGCCTCAGATG-----  
 GCAGGGACCTGACCGACAAAGAAACCAAAGCATTCTGGCCTTGGCGGACAAGGATGGAGACGGGAAGATCGGCCTGAA

>Anguilla\_anguilla\_NC\_049217\_-\_pvalb6\_CDS\_5th\_after\_break

GGACATCAAGAAGGCGATGGATGCGTGTAAG-----  
-----TGGCAGACACTTTTGA---CCATAAGAAGTTCTTT-----  
GAGATGGTGGGTCTGAAGACTAGGTCTACCGATGACCTGAAGAAGGCCTTTCTAGCTCTGGATGTGGACAACAGCGGCTTCATAGAG  
GAGGAGGAGCTTAA-----GTTTTTCCTGAAAGG-GTTCGCCACAGACG-----  
GTCTGAGACCTGACCGACAAAGAAACGAAAGCATTCTACGTGCAGCGGACAAGGACGGAGACGGAAAAATCGGCATGGAA

>Paramormyrops\_kingsleyae\_PARV\_7like\_NW\_019712188\_-\_LOC111846438\_CDS

GGACATTAAGAAGGCCCTTGATGCATTCAAAG-----  
-----CTGCAGACACCTTTGA---CCACAAGAAGTTCTTC-----  
GAGATGGTGGGTCTGAAGAACAAATCTACCGACGACGTGAAGAAAGCCTTCCTGGCCCTGGATGTGGACAACAGTGGATTTATCGAA  
GAGGAGGAGCTCAA-----GTTTGTGCTGAAGGG-TTCTCCACGGACG-----  
GCAGGGACCTGACTGACAAAGAAACCAAGCCTTCTTGCAAGCAGCCGACAAGGACGGAGATGGGAAGATCGGGATGGAA

>Gadus\_morhua\_NC\_044049\_4rd\_aftergap\_LOC115532480\_parv

TGACATCAAGAAGGCCCTGAATGCGTTTCGCAG-----  
-----CGGCGGACTCCTTCGA---CCATAAGAAGTTCTTT-----  
GAGGTGGTTGGTCTGAAGGCGCTGTCAGCAGAAGAGGTGAAGAAGGCCTTCCTGGTGCTGGATGCCGACAACAGCGGATTATAGAG  
GAGGAGGAGCTCAA-----GTTTCATGCTGAAGGG-TTCTCCTCCAGTG-----  
GGCGGGACCTGACAGACCAGGAGACCAAGCCTTCCTCAATGCCGCCGACAAGGACGGAGATGGCAAAATAGGCGTGGAG

>Cyprinus\_carpio\_PARV01\_7X1\_iso4b\_LOC109095329\_cDNA

TGACATTAAGAAAGCCCTGGATGTATTTAAAG-----  
-----CTGTCGACTCATTCTGA---CCACAAGAGGTTTTTT-----  
GAGATGGTTGGACTGAAGGTGAAGTCAGCTGATGATGTGAAGAAGGCTTCCACATCCTGGATGCAGACAATAGCGGCTTTATAGAG  
GAAGAGGAACTTAA-----GTGTGTTTTGAAGCA-TTTTGCTACAGACG-----  
GGAGAGACCTGACTGATAAGGAGACCAAGCATTCTGCAAGGCTGCGGACAAAGATGGAGATGGAAAGATTGGAGCAGAA

>Cyprinus\_carpio\_PARV18\_muscle\_iso4b\_LOC109060208\_cDNA

TGACATTAAGAAAGCCCTGGATGCCTTTCAAG-----  
-----CCGTCGACTCATTTGA---CCCCAAGAGGTTTTTT-----  
GAGATGGTTGGACTGAAGGCTAAGTCGGCTGAAGATGTGAAGAAGGCTTCCACATCCTGGATGCAGACAGTAGTGCTTTATAGAG  
GAGGAGGAACTTAA-----GTTTGTTTTCAAGCA-TTTCGCTACAGACG-----  
GGAGAGACCTGAGTGATAAGGAGACCAAGCATTCTGCAAGGCTGCGGACAAAGATGGAGATGGAAAGATTGGAGCAGAA

>Danio\_rerio\_NC\_007114\_-\_pvalb6\_CDS

TGATATTAAGAAAGCCCTGGACGCATGTAAAG-----  
-----CTCCCGACTCATTTCAA---CCACAAGAGTTTTTT-----  
GAGATGGTCGGACTTAAGGCGAAGGCATCTGACGATGTGAAGAAGGCTTCCACCTCCTGGATGCCGACAATAGCGGGTTTATTGAG  
GAAGAAGAACTTAA-----GTTTGTCTGAAGGC-CTTTGCCACAGACG-----  
GGAGAGACCTGACCGATAAGGAGACCAAGCATTCTGCAAGGCTGCGGACAAAGATGGAGATGGAAAGATTGGAGCGGAA

>Lepisosteus\_oculatus\_PARV\_alpha\_like\_NW\_006271352\_-\_LOC102696689

GGACATCAAGGCGGCTATGGACGCTTTCAAG-----  
-----CTGCCGAGTCCTTCGA---CCACAAGAAGTTCTTC-----  
AAGATGGTGGGTCTGAAGGCCAAGTCGGCCGAGGATGTGAAGAAGGCCTTCAAAGTCTGGACGTAGATCAGAGTGGCTTCATTGAG  
GAGGATGAGCTCAA-----GTAA-----  
-----

>Lepisosteus\_oculatus\_PARV\_alpha\_like\_NW\_006271359\_-\_LOC102697080

GGACATCAAGGCGGCTATGGACGCTTTCAAGG-----  
-----CTGCCGAGTCCTTCGA---CCACAAGAAGTTCTTC-----  
AAGATGGTGGGTCTGAAGGCCAAGTCGGCCGAGGATGTGAAGAAGGCCTTCAAAGTGCTGGACGTAGATCAGAGTGGCTTCATTGAG  
GAGGATGAGCTCAA-----GTAA-----  
-----  
>Gadus\_morhua\_NC\_044050\_single\_LOC115541112\_parv  
GGATATCAAGAAGGCTCTGGATGCCTTTGCAG-----  
-----TGGCGGACTCGTTTGA---CCACAGGAAGTTCTTT-----  
GAGCTGGTGGGGATGCGGGCCATGGAGGCGGACAGCGTGAACAAGGTGTTCCAGGCCCTGGACGTGGACGCCAGCGGCTATATCGAG  
GAGGAGGAGCTGAA-----GTTCTCTCTGAAGGG-GTTCTCCGAAGAGG-----  
GCAGGGACCTGACCGACGCGGAGACCAAGAAGTTCTTGACGCTGCCGACAAGGACGGCGACGGGAAGATCGGCATGGAT  
>Acipenser\_ruthenus\_PARV\_7\_NC\_048357\_-\_pvalb7  
TGATATCACCAAGGCCCTGGCTGCCTTCAAGG-----  
-----CCGCTGAATCGTTTCGA---CCACAAGAAATTTTTC-----  
CAGATGATCGGTCTGAAGAGCAAGTCTTCTGAAGATGTCAAGAAGGTGTTCAAGATCCTGGACCAGGATGCGAGTGGCTTCATTGAG  
GAGGATGAGCTTAA-----ACACGTGCTCAAGGG-CTTCGACAAGGCGG-----  
GCAGAGACCTGTCTGACAAGGAAACCAAACTTTCTATAAAGCGGCAGACAAGGACGGCGACGGCATGATTGGGATAGAT  
>Polypterus\_senegalus\_NC\_053163\_pvalb7  
TGACATCTCTAAGGCTGTGGGAGCATTCAAGG-----  
-----CTGCAGAGTCCTTTGA---CCACAAAAAGTTTTC-----  
GAGATGGTTGGTCTAAAGAAGAAAACCTCCAGATGAGGTCAAAAAGGTCTTTCAGATTCTGGATCAGGACCACAGTGGCTTCATTGAG  
GAAGAGGAACTCAA-----GTTTGTGATGAAGGG-TTTTCTAAAGATG-----  
GCAGAGACCTGTCTGATGCTGAAACCAAAAAATTTATGAAAGCGGGTGACAAGGACGGAGATGGCAAAATCGGCATTGAT  
>Gallus\_gallus\_PARV\_muscle\_NC\_052532\_-\_PVALB\_CDS  
GGATATCAAGAAGGCTGTGGGAGCCTTTTCAG-----  
-----CAGCTGAATCTTTTAA---CTACAAGAAGTTCTTT-----  
GAGATGGTGGGTTGAAAAAGAAGAGCCCAGAAGACGTGAAGAAGGTTTCCATATCCTTGATAAAGACCGGAGCGGCTTCATCGAA  
GAGGAAGAGCTAAA-----GTTTGTACTGAAGGG-CTTTACCCAGATG-----  
GCAGAGACCTATCAGACAAAGAGACAAAGGCTCTTCTGGCTGCTGGAGATAAGGACGGTGATGGTAAAATTGGCGCTGAT  
>Homo\_sapiens\_PARV\_X63578\_-\_PVALB\_CDS  
GGACATCAAGAAGGCGGTGGGAGCCTTTAGCG-----  
-----CTACCGACTCCTTCGA---CCACAAAAAGTTCTTC-----  
CAAATGGTGGCCTGAAGAAAAAGAGTGCAGGATGATGTGAAGAAGGTGTTTCATATGCTGGACAAGGACAAAAGTGGCTTCATCGAG  
GAGGATGAGCTGGG-----ATTCATCCTAAAAGG-CTTCTCCCAGATG-----  
CCAGAGACCTGTCTGCTAAAGAAACCAAGATGCTGATGGCTGCTGGAGACAAAGATGGGGACGGCAAAATTG-----AC  
>Mus\_musculus\_PARV\_NC\_000081\_-\_Pvalb\_CDS  
GGACATCAAGAAGGCGATAGGAGCCTTTGCTG-----  
-----CTGCAGACTCCTTCGA---CCACAAAAAGTTCTTC-----  
CAGATGGTGGGCCTGAAGAAAAAGAACCCGGATGAGGTGAAGAAGGTGTTCCATATTCTGGACAAAGACAAAAGTGGCTTCATTGAG  
GAGGATGAGCTGGG-----GTCCATTCTGAAGGG-CTTCTCCTCAGATG-----  
CCAGAGACTTGTCTGCTAAAGAAACAAAGACGCTTCTGGCCGCTGGAGACAAGGATGGGGACGGCAAGATTGGGGTTGAA  
>rattus\_norvegicus\_RATPALB\_-\_parvalbumin\_CDS  
GGACAUCAAGAAGGCGAUAGGAGCCUUUACUG-----  
-----CUGCAGACUCCUUCGA---CCACAAAAAGUUCUUC-----

CAGAUGGUGGGCCUGAAGAAAAAGAGUGCGGAUGAUGUGAAGAAGGUGUCCACAUUCUGGACAAAGACAAAAGUGGCUUCAUUGAG  
 GAGGAUGAGCUGGG-----GUCCAUUCUGAAGGG-CUUCUCCUCAGAUG-----  
 CCAGAGACUUGUCUGCUAAGGAAACAAAGACGCUGAUGGCUGCUGGAGACAAGGACGGGGACGGCAAGAUUGGGGUUGAA  
 >Xenopus\_laevis\_PARV\_pvalb\_NC\_030680\_-CDS  
 TGACATCAAAAATGCTTTGGGGCCTTTGGAG-----  
 -----CCCCTGACTCATTTAA---CCACAAGAAATTCTTT-----  
 GAGTTGTGTGGCCTGAAGAAAAAGAGCCCTGACGACGTCAAGAAAGTCTTCCACATTCTCGACAAGGATCGAAGTGGATTCATAGAA  
 GAGGATGAACTCAA-----GCTCTTATTACAAGG-ATTTGCCACAGATG-----  
 GCCGTGCTCTCTCTGATAAGGAAACCAAGGCGCTCCTTGCCGAGGTGACAAAGATGGAGATGGCAAAATCGGAGTAGAT  
 >Xenopus\_laevis\_PARV\_pvalbL\_NC\_030730\_-LOC100036820\_CDS  
 TGACATCAAAAATGCCGTGGGGCCTTTGCAG-----  
 -----CCGCTGACTCATTTAA---CCACAAGAAATTCTTT-----  
 GAGTTGGTCGGCCTGAAGAAAAAGAGTATGGATGACGTCAAGAAAGTCTTTCACATTCTCGACCAGGATCGAAGTGGATTCATAGAA  
 GAAGATGAACTCAA-----GCTTGATTATAAAGG-ATTCACCCAGATG-----  
 GCCGTGCTCTCTCCGATAAGGAAACCAAGACGCTCCTCGCCGAGGTGACAAAGATGGAGATGGCAAAATCGGAGTAGAT  
 >Xenopus\_laevis\_PARV\_pvalbS\_NC\_030731\_-CDS  
 TGACATCAAAAATGCTGTGGGGCCTTTGCAG-----  
 -----CCGCTGACTCATTTAA---CCACAAGAAATTCTTC-----  
 GAGTTGGTCGGCCTGAAGAAAAAGAGCGTCGATGACGTCAAAAAAGTCTTCCACATTCTCGACCAGGATCGAAGTGGATTCATAGAA  
 GAGGATGAACTCAA-----GCTTGATTATAAAGG-ATTCACCCAGATG-----  
 GCCGCGCTCTCTCTGATAAGGAAACCAAGACACTCCTCGCCGAGGTGACAAAGATGGAGACGGCAAAATCGGAGTAGAT  
 >Callorhinchus\_milii\_PARV\_alpha\_NW\_006891462  
 TGACATCACCAAAGCCCTCGGTGAATTCAAAG-----  
 -----GTGCTGACAGCTTTGA---CCACAAGAAGTTCTTT-----  
 CATATGATCGGGCTGAAGAAGAAGAATGCCAAGGATGTGGAGGCAGTCTTCTACATCCTTGATAAGGACAAGAGTGGCTTCATTGAG  
 GAAGACGAGCTGAA-----GTCTGTGCTCAAAATG-CTTTGCTCCCGAAG-----  
 GCAGAGACCTGTCTGAAAAAGAAACCAAGGAATTACTCACTGCTGGGGATGAGGACGGTGACGGCAAAATTGGCGTTTCC  
 >Esox\_lucius\_NC\_025972\_3rd\_LOC105031387\_parv  
 GGCTATAGAGAACGCCGTCAAGGAGTTCCAAG-----  
 -----CCCCAGAGTCTTTCAG---CTTCAAGAAGTTTTTC-----  
 CAGCTGTGTGGCCTGTCTCCAAGTCTCCCAAGGAAGTCAAAGATGTCTTCCAGATCCTTGACAGCGACAATAGTGGTTACATCGAG  
 GAGGCTGAGCTCAA-----GTTCTTCTTGACGCG-GTTTGTCCAGGGG-----  
 CACGGACGCTGACTGACACTGAATGCAAAGGCTTCTGTCTGCGCCGATGACGACAACGATGGCAAGATCGGAGTAGAA  
 >Salmo\_salar\_NC\_027300\_4th\_LOC106610070  
 GGATATTGAGAATGCCGTCAAGGAGTTCCAAG-----  
 -----CCCCAGACTCCTTCAG---CTTCAAGAAGTTTTTC-----  
 CAGCTGTGTGGCCTGACCTCCAAGTCTCCCAAAGAAGTCAAAGATGTCTTCCAGATCCTTGACGACGACAACAGTGGCTACATCGAG  
 GAGTCAGAGCTCAA-----GTTCTTCTGCAACG-GTTTGTCCCGGGG-----  
 CGCGGACACTGACAGACGCTGAATGCAAAGGCTTCTGTCTGCAGCCGATGATGACAACGACGGCAAGATCGGAGTAGAA  
 >Salmo\_salar\_NC\_027327\_4th\_LOC106589582  
 GGCTATTGAGAATGCCGTCAAGGAGTTCCAAG-----  
 -----CCCCAGACTCCTTCAG---CTTTAAGAAGTTTTCC-----  
 CAGCTGTGTGGCCTGACCTCCAAGTCTCCCAAAGAAGTCAAAGATGTCTTCCAGATCCTTGACGATGACAACAGTGGCTTCTCTCGAG

GAGTCAGAGCTCAA-----GTTCTTCCTGCAACG-GTTTGTCCCCGGGG-----  
 CGCGGACGCTGACGGACGCTGAGTGCAAAGGCTTCCTGTCTGCAGCTGATGATGACAACGATGGCAAGATCGGAGTAGAA  
 >NeoBri\_NW\_006272077\_extraction\_-\_LOC102785521\_CDS  
 CGACATCCAAAATGCCATTAAGGACTGTGAAG-----  
 -----CTCCGGACACTTTCTG---CTACAAGAAGTTCTTT-----  
 AAGCTGTGCGGCCTGTCCTCAAAGACACCCAAGGAGGTCAAAGATGTGTTCCAGATCCTCGACGAGGACAACAGCGGCTACATCGAG  
 CACTCTGAGCTCAA-----GTTTTTTCTGCAGCG-GTTTATCCCCAGTG-----  
 CACGGACACTGACTGACGCAGAAACCAAGAGCTTCATCTCAGCAGCTGATGATGACAGCGATGGCAAAATTGGAGTAGAG  
 >Tilapia\_NC\_031973\_01\_LOC100707774\_parvalbumin\_thymic  
 CGACATCCAAAATGCCATCAAGGACTGTGAAG-----  
 -----CTCCGGACACTTTCTG---CTACAAGAAGTTCTTT-----  
 AAGCTGTGCGGCCTGTCCTCAAAGACACCCAAGGAGGTCAAAGATGTGTTCCAGATCCTCGACGAGGACAACAGCGGCTACATCGAG  
 CACTCTGAGCTCAA-----GTTTTTTCTGCAGCG-GTTTATCCCCAGTG-----  
 CACGGACACTGACTGACGCAGAAACCAAGAGCTTCATCTCAGCAGCTGATGATGACAGCGATGGCAAAATTGGAGTAGAG  
 >Sparus\_aurata\_NC\_044206\_3rd\_LOC115570800\_parv  
 GGCCATTGAAAAAGCAGTCAAGGACTGTCAAG-----  
 -----CTCCGGACACATTCTG---CTACAAAAAGTTCTTC-----  
 CAGCTGTGTGGCCTGTCCTCGAAGTCGCCAAAGGAAATCAAAGATGTCTTCCAGATCCTCGATGAGGACAACAGCGGCTTCATCGAG  
 GAGTCTGAGCTCAA-----GTACTTCCTGCAGCG-GTTCGTCCCCGGGG-----  
 CACGAACACTGACTGAGGCAGAAACCAAGAGATTTCATCTCAGCAGCTGATGATGACAGTGATGGCAGAATTGGAGCGGAG  
 >tuna\_BKCK01000054\_parv\_cluster\_3rd\_cDNA  
 GGCCATTGAAAATGCTATCAAGGACTGTCAAG-----  
 -----CTCCGGACACATTCTG---CTACAAGAAGTTCTTC-----  
 AAGCTGTGTGGACTCTCGTCAAAGACGCCCAAGGAGGTCAAAGATGTCTTCCAGATCCTTGATGATGACAACAGCGGCTACATCGAG  
 GAGTCTGAGCTCAA-----GTTCTTCCTACAGCG-GTTTGTCCCCGGGG-----  
 CACGAACACTGACTGAGGCAGAAACCAAGAGCTTCATCTCAGCAGCTGATGATGATAGTGATGGCAAAATTGGAGCAGAG  
 >Gadus\_morhua\_NC\_044065\_4th\_LOC115531335\_parv  
 GGCCATTGAAAGCGTGTCAAGGACTGTCAAG-----  
 -----AACCAAACTCCTTCTG---CTACAAGAAGTTCTTC-----  
 AAGTTGTGCGGACTCACTTCGAAGAGCCCCAAGAGGTGAAAGATGTCTTCAGCATCCTTGATGAAGACAACAGCGGCTACATCGAA  
 GAGTCTGAACTAAA-----ATTCTTCCTGCAGCG-GTTCGTCCCCGGGG-----  
 CCCGCACGCTGACCGAAGCCGAGGCAAAGAGCTTCGTCTCGGCCGCCGACGATGACAACGACGGCAAGATTGGCGTGGAG  
 >Cyprinus\_carpio\_PARV12\_cluster\_3rd\_parv\_thymic\_CPV3like\_LOC109100279\_cDNA  
 TGCCATTGAAAATGCTGTCAAAGACTGCCAAG-----  
 -----CTCCAGACTCCTTCTG---TTATAAAAAGTTCTTC-----  
 CAACTTTGTGGCCTGAGCCAGAAAAGTCCCCAAGAGGTGAAGGATGTCTTCCGCATCATAGATGATGATGACAGTGGATTATTGAG  
 GAGGCTGAGCTCAA-----GTTCTTTCTCCAGCG-ATTTTCCAGGGG-----  
 CACGAACCTCTGACAGAAAAGGAGATTAAGAGCCTCCTTACAGCTGCAGATGATGATAGCGATGGCCGAATTGGAGTAGAT  
 >Cyprinus\_carpio\_PARV12\_cluster\_4th\_parv\_thymic\_CPV3like\_LOC109100350\_cDNA  
 TGCCATTGAAAATGCTGTCAAAGACTGCCAAG-----  
 -----CTCCAGACTCCTTCTG---TTATAAAAAGTTCTTC-----  
 CAACTTTGTGGCCTGAGCCAGAAAAGTCCCCAAGAGGTGAAGGATGTCTTCCGCATCATAGATGATGATGACAGTGGATTATTGAG  
 GAGGCTGAGCTCAA-----GTTCTTTCTCCAGCG-ATTTTCCAGGGG-----  
 CACGAACCTCTGACAGAAAAGGAGATTAAGAGCCTCCTTACAGCTGCAGATGATGATAGCGATGGCCGAATTGGAGTAGAT

>Danio\_rerio\_NC\_007123\_-\_pvalb9\_CDS

AGCCATTGAAAATGCTGTCAAAGACTGCCAAG-----  
-----CTCCGGACTCCTTTTG---TTACAAAAAGTTCTTC-----  
CAGCTTTGTGGCCTGAGCCAGAAAACCTCCTCAGGAGGTGAAGGATGTCTTCCGTATCATAGATGAGGATAACAGTGGATTTATCGAG  
GAGGCTGAGCTCAA-----GTTCTTTCTCCAGCG-GTTTTTCCCGGGG-----  
CACGAACCCTGACAGAAAAGGAGATTAAGAGCCTCCTCACAGCTGCAGATGATGATAGTGATGGCCGAATTGGAGTAGAT

>Esox\_lucius\_NC\_025978\_3rd\_LOC105013011\_parv

TGCAATCGAAACAGCTCTAAAGGAATGCCTGG-----  
-----CACCGGACTCCTTCAA---CTGCAGGAAATTCTTT-----  
CAACAATGTGGTCTGTCCAAGAAGAGCCCTGCGGAAGTGAAGACTGTCTTTAAATTCTGGACAATGACAACAGTGGATACATTGAG  
GAGGAGGAACTCAA-----GTACATCCTGCAGAG-GTTCTCCCTTGGGG-----  
CTCGTGTCTGACTGACAAAGAGACCAAGGCCTTCATGTCCGCTTGTGACGATGACAGCGATGGCATGATTGGGGCAGAT

>Salmo\_salar\_NC\_027302\_2nd\_LOC106601824

TGCAATAGACGCTGTATGAAGGACTGCCAAG-----  
-----CACCGGACTCCTTTAA---CTGCAAGAAGTTCTTC-----  
CAGCAGTGTGGCTTGACCAAAAAGAGTCCCGCGGAGGTGAAGAAAGTCTTCGGGATCCTGGACAACGATGCCAGCGGCTTCATTGAG  
GAGGAGGAACTCAA-----ATTCTTCTCCAGCG-GTTCAACCCCGGGG-----  
CCCGTGTCTGACTGAAAAAGAGACCAAGGCCTTCATGTCTGCTGCTGATGATGACAGCGACGGCATGATTGGAGCAGAT

>Salmo\_salar\_NC\_027305\_3rd\_LOC106606664

TGCAATAGACGCTGTATGAAGGACTGCCAAG-----  
-----CACCGGACTCCTTCAA---CTGCAAGAAGTTCTTC-----  
CAGCAGTGTGGCTTGACCAAAAAGAGTCCCGCGGAGGTGAAGAAAGTCTTCGGGATCCTGGACAACGACGCCAGCGGCTTCATTGAG  
GAGGAGGAACTCAA-----ATTCTTCTCCAGAG-GTTCAACCCCGGGG-----  
CCCGTGTCTGACTGAAAAAGAGACCAAGGCCTTCATGTCTGCTGCTGATGATGACAGCGACGGCATGATTGGAGCAGAT

>NeoBri\_NW\_006272021\_extraction\_-\_LOC102781067\_CDS

TGCCATCGACAGTGTATCAAGGACTGCCAAG-----  
-----CTCCAGACTCCTTCTC---TGCTAAGAAGTTTTTC-----  
CAGATATGTGGCCTCACCAAGAAGAGCCCTCAGGATATAAAGAAAGTTTTTGGGATTCTGGACAACGACGCCAGTGGCTTTATCGAG  
GAAGAAGAGCTCAA-----GTTTTTCTCCAGAG-GTTTTGTCCCGGGG-----  
CTCGTGTCTGACAGATAAGGAGACCAAGGCTTTCCTGAGTGTCTGCTGATGATGATAGCGATGGTATGATTGGAGCAGAT

>Tilapia\_NC\_031969\_01\_LOC100692367\_parvalbumin\_thymic\_CPV3

TGCCATCGACAGTGTATCAAGGACTGCCAAG-----  
-----CTCCAGACTCCTTCTG---TGCTAAGAAGTTTTTC-----  
CAGATGTGTGGCCTCACCAAGAAGAGCCCTCAGGATATAAAGAAAGTTTTTGGGATCCTGGACAAATGATGCCAGTGGCTTTATTGAG  
GAAGAAGAGCTCAA-----GTTTTTCTCCAGAG-GTTTTGTCCCGGGG-----  
CTCGTGTCTGACAGATAAGGAGACCAAGGCTTTCCTGAGTGTCTGCTGATGATGATAGCGACGGCATGATTGGAGCAGAT

>tuna\_BKCK01000006\_parv\_cluster\_4th\_cDNA

TGCCATCGACAGTGTATCAAGGACTGCCAAG-----  
-----CACCAGACTCCTTCTG---CCCCAAGAAGTTCTTC-----  
CAGATGTGTGGCCTCACCAAGAAGACCCCCAGGACGTGAAGAAAGTTTTTGCGATCCTGGACAATGATGGCAGTGGTTTCATTGAG  
GAGGAAGAGCTGAA-----GTTTTTCTCCAGAG-GTTTAATCCTGGGG-----  
CTCGCGTTCTGACAGACACAGAGACCAAGCCTTCCTGTGTGCTGCTGATGATGATAGCGACGGCATGATTGGAGCAGAG

>Sparus\_aurata\_NC\_044209\_4th\_LOC115574991

TGCCATCGACAGTGCTATCAAGGACTGCCAAG-----  
 -----CACCAGACACCTTCTG---CCCCAAGAAGTTCTTC-----  
 CAGGCTTGTGGCCTCACCAGAAGAGCCCCAGGATGTGAAGAAGGCCTTCGCCATCCTGGACAACGATGGCAGCGGTTTTATCGAG  
 GAGGAAGAGCTCAA-----GTTTTTCCTCCAGAG-GTTTTCTCCTGGTG-----  
 CTCGCGTCTGACAGATAAGGAGACCAAGGGCTTCCTGGCCGCTGCTGATGACGACAGTGATGGTCGGATTGGAGCAGAA  
 >Anguilla\_anguilla\_NC\_049217\_-LOC118216345\_CDS\_4th  
 CGCCATCGACAGTGCCATCAAGGATTGTTCAAG-----  
 -----CCCCGATTCTTCTG---TTCTAAGAAGTTCTTC-----  
 CAGATATGTGGTTTGACCAAGAAAAGCCACAGGAAGTGAAGGAGGTGTCCGCGTTCTGGACAACGATGACAGCGGTTACATTGAG  
 GAGGAGGAGCTCAA-----GTTCTTCCTGCAGCG-ATTCTCTTCTGGGG-----  
 CTCGTGTGCTGACTGAGAAGGAGACCAAGGCCTTCCTGGTTGCTGCTGATGGCGACAGTGACGGGAAGATTGGAGTGCAA  
 >Gadus\_morhua\_NC\_044049\_3rd\_LOC115536242\_parv  
 TGCCATCGACAACGCTATCAAGGACTGCCAAG-----  
 -----CTCCGGATTCTTCTG---TCCCAAGAAGTTCTTT-----  
 CAGATCTGTGGTCTTTCCAAGAAGAGTCCAGCAGAGGTGAAAAAGCGTTCGCCATTATGGACAATGATGCCAGCGGCTTCATCGAG  
 GAAGAAGAGCTCAA-----GTTTTTCCTCCAGAG-GTTTTCTCCTGGAG-----  
 CACGTGTGTTGACCGCCGCAGAGACCAAGAACTTCCTGTCTGCTGCCGACGACAGTGACGGCAAAATCGGTGCTGAT  
 >Cyprinus\_carpio\_PARV05\_cluster\_4th\_parv\_thymic\_CPV3like\_LOC109097138\_cDNA  
 TGCCATCGACTGTGCACTCAAGGACTGTCAAG-----  
 -----CTCCTGACTCCTTCAA---CCCCAGAAAGTTCTTC-----  
 CAGCTGTGTGGTCTTGACAAAGAAAAGCCCTCAGGAAGTGAAGAATGTCTTTAACATCTTGACAACGATGCCAGCGGATTCATCGAG  
 GAGGAAGAGCTCAA-----GTTTTTCCTGCAGCG-GTTCTCAGCTGGAG-----  
 CTCGTGTACTGACCGACAAAGAGACAAAGGCTTTCCTATCAGCAGCTGACGATGACAGCGATGGCAAGATTGGAGTGGAT  
 >Cyprinus\_carpio\_PARV09\_cluster\_8th\_parv\_thymic\_CPV3\_LOC109097136\_cDNA  
 TGCCATCGACTGTGCACTCAAGGACTGTCAAG-----  
 -----CTCCTGACTCCTTCAAC---CCCCAAAAAGTTCTTC-----  
 CAGCTGTGTGGTCTGACAAAGAAGAGCCCTCAGGAAGTGAAGAATGTCTTTAACATCTTGACAACGATGCCAGCGGATTCATCGAA  
 GAGGAAGAACTCAA-----GTTTTTCCTGCAGCG-GTTCTCACCTGGAG-----  
 CTCGTGTACTGACCGATAAAGAGACAAAGGGTTTCCTGTGCGCAGCTGACGATGACAGCGATGGCAAGATTGGAGCAGAA  
 >Danio\_rerio\_NC\_007114\_-pvalb8  
 TGCCATCGACTGTGCACTCAAGGACTGTCAAG-----  
 -----CTCCAGACTCATTGAG---CCCCAAAAAGTTCTTC-----  
 CAGCTGTGTGGGATGACCAAGAAAAGCCCTCAGGATGTGAAGAACATCTTCAACATCCTGGACAACGACGCCAGTGGCTTCATCGAG  
 GAGGACGAACTCAA-----GTTTTTCCTGCAGCG-GTTCTCCGGCGGCG-----  
 CTCGCGTGTGACCGATAAAGAGACAAAGGCTTTCCTAGCAGCAGCCGACGACAGCGATGGCAAGATTGGAGCAGAA  
 >Anguilla\_anguilla\_NC\_049202\_-pvalb9\_CDS\_3rd  
 TGCCATCGAGAATGCTATCAAGGATTGCCAAG-----  
 -----CTCCAGACTCCTTCAA---TTCCAAAAAGTTTTTC-----  
 CAGTTGAGTGGCCTTACCAAAAAGAGTCCTCAAGAAGTGAAGGATGTCTTCTGTATCCTGGATAACGATGGTAGTGGCTTCATTGAA  
 GAAGAAGAGCTAAA-----ATTCTTCCTGCAGCG-GTTCTCCCCAGGGG-----  
 CTCGGTTGTTGACTGATAAGGAGACAAAGTCATTTCCTCTCAGATGCTGATGATGACAGTGATGGCAAAATTGGAGCAGAA  
 >Paramormyrops\_kingsleyae\_PARV\_thymiclike\_isoformX1\_NW\_019716143\_-LOC111842548\_CDS  
 TGCCATTGAAAATGCTATCAAGGACTGTCAAG-----  
 -----CTCCTGACTCTTCTG---TTACAAAAAGTTTTTC-----

CAGCTGTGTGGCTTGAGCTCAAAAACCCCCAGGAAGTGAAGACGTCTCCGTTGCATTGATGATGACGACAGCGGTTTCATTGAG  
 GATGAAGAGCTCAA-----GTTCTTCTCCAGAA-ATTCAGCCCTAGTG-----  
 CTCGCCTGCTGACCGAGAAAGAGACCCAGGCTATACTGAATGCCTGCGATGATGACGGCGATGGGAAGATTGGAGTAGAC  
 >Acipenser\_ruthenus\_PARV\_NC\_048335\_5th\_pvalb8  
 TGACATCGCTAATGCCCTGAAAGACTGTCAAG-----  
 -----CTCCAGACAGCTTCAG---TCCAAAAAAATTCTTC-----  
 CAGCTCTGCGGGCTGCGCAAGAAAACCCCCAAAGAGGTGACAGAAGTCTTCTATATCCTGGACAACGACCAGAGTGGCTTCATCGAG  
 GAAGATGAATTGAA-----GTTTTTTCTTCAGAG-GTTCTCCCCTTCTG-----  
 CACGAGTGCTGACTGCAGCTGAGACCAAGGCATTCTTAAAGCTGCAGACGACGATGACGATGGCAAGATCGGAGCTGAA  
 >Acipenser\_ruthenus\_PARV\_thymic\_CPV3\_isoform\_X1\_NC\_048337\_5th\_LOC117431669  
 TGACATCGCTAATGCCCTGAAAGACTGTCAAG-----  
 -----CTCCAGACAGCTTCGG---TCAAAAAAAATTCTTC-----  
 CAGATCTGCGGACTGTGCAAGAAAACCCCCAAAGAGGTGACGGAAGTCTTCCATATCCTGGACAACGACCAGAGTGGCTTCATCGAG  
 GAAGAAGAATTGAA-----GTTTTTTCTTCAGAG-GTTCTCCCCTTCTG-----  
 CACGAGTGCTGACTGCAGCCGAGACCAAGGCATTCTTAAAGCTGCAGACGATGATGATGATGGCAAGATCGGAGCTGAA  
 >Acipenser\_ruthenus\_PARV\_NC\_048337\_6th\_aftergap\_LOC117962754  
 TGACATCGCTAATGCCCTGAAAGACTGTCAAG-----  
 -----CTCCAGACAGCTTCGG---TCAAAAAAAATTCTTC-----  
 CAGATCTGCGGACTGTGCAAGAAAACCCCCAAAGAGGTGACGGAAGTCTTCCATATCCTGGACAACGACCAGAGTGGCTTCATCGAG  
 GAAGAAGAATTGAA-----GTTTTTTCTTCAGAG-GTTCTCCCCTTCTG-----  
 CACGAGTGCTGACTGCAGCCGAGACCAAGGCATTCTTAAAGCTGCAGACGATGATGATGATGGCAAGATCGGAGCTGAA  
 >Polypterus\_senegalus\_PARV\_thymic\_like\_NC\_053166\_-\_LOC120543080  
 TGACATCGCCAATGCCCTGAAGGACTGCCAAG-----  
 -----CTGAAAACAGCTTCAA---TCACAAAAAGTTCTTC-----  
 CAGCTATGTGGTATGACAAAGAAGAGTCCCAAAGAGATTAAGGAAGCGTTGCCATCCTGGACAATGACAGGAGTGGCTTCATTGAA  
 GAGGAAGAATTGAA-----GTTTTTCTTACAAAG-GTTTTCCCCTGGCG-----  
 CCCGAGTGCTGACTGAAGCGGAGACTAAATCCTTCTGGCTGCTGCTGACGATGACAATGATGGCAAGATTGGAGCTGCA  
 >Gallus\_gallus\_OCM\_NC\_052545\_-\_OCM1\_CDS  
 TGATATTGCTGCTGCTCTGCGGGACTGCCAAG-----  
 -----CTCCAGATTCTTTAG---TCCAAAAAAATTCTTT-----  
 CAGATCAGTGGGATGTCCAAAAAGAGTAGTACCAGCTCAAGGAGATCTTCCGATTCTCGACAATGATCAAAGTGGCTTTATTGAG  
 GAAGATGAGCTCAA-----GTATTTCTTCAGAG-GTTTGAGTGTGGAG-----  
 CCAGAGTGCTAACTGCCTCCGAAACCAAGACCTTCTGGCAGCTGCAGACCACGACGGGGATGGCAAAATTGGGGCTGAA  
 >Paramormyrops\_kingsleyae\_PARV\_thymic\_CPV3\_like\_NW\_019713787\_-\_LOC111855909\_CDS  
 TGCGATTGCTAATGCTTTGAAGGAGTGCAAAG-----  
 -----CACCAGACACCTTCTG---TCATAAGAAGTTCTTC-----  
 CAAACATGTGGACTGACCAAGAAGACTTCCCAGGAAGTGAAGAACGTGTTCCGCATCCTCGACGATGATGGGAGCGAGTTTATTGAG  
 GAGGACGAGCTCCA-----ATTCTTCTGCAGCG-ATTCTCTCCCAGCG-----  
 CACGCGTGCTCACGAAAGTGAGACGAAGAAGTTCATGCTTGCCCTAGATGAAGATAACGATGGCAAGATAGGCATTGAC  
 >Xenopus\_laevis\_OCM\_NC\_030685\_-\_ocm1\_CDS  
 TGATATAGCTGCTGCTCTGAGGGAGTGCCAAG-----  
 -----CTCCTGACACTTTCAA---TTACAAGAAATTCTTC-----  
 AAGACTTGTTGTTAACTAAAAAATCCCCTAATGAAGTGAACAAGTTTTCGGAGTAATGGATAACGATGAGAGTGGCTATGTTGAA

GAAGATGAACTTAA-----GTATATTCTTCAGCG-CTTTGATCCCTCAG-----  
CCAGAGTGCTAACATCCTCTGAGGCAAAGGATTTTCATGGCTGGAGTCGATCATGATGGAGATGGGAAAATTGGAGTTGAA  
>Xenopus\_laevis\_PARV\_NC\_030741\_-\_LOC108703150\_CDS  
TGATATAGCTGCTGCTATGAGGGAGTGCCAAG-----  
-----CTCCTGACACTTTCAG---TTACAAGAAATTCTTC-----  
AAGACCTGTGGTCTAACTAAAAAGTCACCTAACGAAATGAAACAAGTTTTTGGAGTGATGGATAATGATGAGAGTGGCTATGTTGAA  
GAACACGAACTTAA-----GTTTTTCTTCAGCG-TTTTGATTCTTCAG-----  
CCAGAGTGCTAACATCCTCTGAGACAAAAGATTTTCATGGCTGGAGCCGATCATGATGGAGATGGGAAAATTGGATTGAA  
>Xenopus\_laevis\_PARV\_thymic\_CPV3\_like\_NC\_030740\_-\_LOC108701585\_CDS  
TGATATAGCTGCTGCCCTGAGGGAGTGCCAAG-----  
-----CTCCTGATACTTTCAA---TTACAAGAAATTCTTC-----  
AAGACCTGTGGTATACTAAAAAGACACCTAATGAAGTCAAACAAGTTTTCGGTGTAATGGATAATGACGAGAGTGGCTACGTTGAA  
GAAGACGAACTTAG-----GTTTTTCTTCAACG-ATTTGATCCCTCTG-----  
CCAGAGTGCTAACATCCTCTGAGACTAAGGATTTTCATGGCTGGAGCTGATCATGATGGAGATGGGAAAATTGGAGTTGAT  
>Homo\_sapiens\_OCM\_NC\_000007\_-\_OCM2\_CDS  
TGACATTGCAGCAGCGCTCCAGGAATGCCAAG-----  
-----ACCCAGACACTTTTGA---ACCCCAAAAATTCTTC-----  
CAGACGTCAGGCCTCTCCAAGATGTCAGCCAGTCAGGTGAAGGATGTTTTCCGGTTCATAGACAACGACCAGAGCGGGTATCTGGAT  
GAAGAAGAGCTTAA-----GTTTTTCTCCAGAA-GTTTGAGAGTGGTG-----  
CCAGAGAACTGACCGAGTCAGAAACCAAGTCCTTGATGGCTGCGGCGGATAATGATGGAGATGGGAAAATTGGAGCAGAG  
>Homo\_sapiens\_OCM\_NC\_000007\_-\_OCM\_CDS  
CGACATTGCAGCAGCGCTCCAGGAATGCCGAG-----  
-----ACCCAGACACTTTTGA---ACCCCAAAAATTCTTC-----  
CAGACATCAGGCCTCTCCAAGATGTCAGCCAATCAGGTGAAGGATGTTTTCCGGTTCATAGACAACGACCAGAGCGGGTACCTGGAT  
GAAGAAGAGCTTAA-----GTTTTTCTCCAGAA-GTTTGAGAGTGGTG-----  
CCAGAGAACTGACCGAGTCAGAAACCAAGTCCTTGATGGCTGCGGCGGATAATGATGGAGATGGGAAAATTGGAGCAGAG  
>Mus\_musculus\_OCM\_NC\_000071\_-\_Ocm\_CDS  
TGACATTGCAGCGGCCCTGCAGGAATGCCAAG-----  
-----ACCCAGACACCTTTGA---ACCACAAAAGTTCTTC-----  
CAGACATCGGGCCTCTCCAAGATGTCTGCCAGCCAATTGAAGGATATCTTCCAGTTCATAGACAACGACCAGAGTGGATACCTGGAT  
GAAGATGAGCTCAA-----GTATTTCTACAGAG-GTTCAGAGCGACG-----  
CTAGAGAACTGACCGAGTCAGAGACCAAGTCCTTGATGGATGCAGCGGACAACGATGGAGATGGGAAGATTGGGGCTGAT  
>Callorhinchus\_milii\_PARV\_thymic\_like\_NW\_006890083\_-\_LOC103178700  
TGACATTAGCAACGCCATTAAAGAATGCCAGG-----  
-----CACTTGAATCCTTCGA---TTTCAAGAAATTCTTT-----  
CAGACTTCTGGTCTATCTCGAAAGTCTGCAGACGAAATCAAAAATGTTTTCTGGCCATGGACGATGACGACAGTGGCTACATAGAA  
CTGGACGAGTTGAA-----GTTCTTCTGCAGAG-GTTCTCTCCAATTG-----  
CTAGGGTGCTGACTGAGGCTGAGACTGAGGCATTCCTTAAAGCTGCAGACACCGATGGTGATGAGAGGATTGGCACTCAG  
>Callorhinchus\_milii\_OCM\_2\_NW\_006890083  
AGACATCGCCTCTGCTGTGTCCCAGTGCTCTG-----  
-----CCGTCAATTCTTTCTG---CCACAAGAAATTTTTC-----  
ACAACCTGTGGTCTCTCCAAGAAGAGTGAGACTGATGTCAAAAAGGTTTTCAAGGTGCTTGATCAAGATCAAAGTGGGTACATTGAG  
GATGCTGAGCTCAA-----GCTGTTCTCCAGAG-CTTCTCCACAGGTG-----  
CCAGAGAACTGACTGAAGCTGAGACCGCAGCTTTCCTGAAAGCTGGAGATGAAGATGGTGATGGCATGATTGGAGCTGAT

>Callorhinchus\_milii\_PARV\_thymic\_like\_NW\_006890083\_-\_LOC103178699

TGACATCGATTCTGCTATCTCGCAATTTAGTG-----  
-----CTCCTGATTCACTCAA---CTTGAAGAAGTTTTT-----  
GAGGCATCTGGTCTCTCCAGGAAATCTGCAGACGAGGTGGCAAAGGTCTTCGAGATAATGGACCAGGATAACAATGGCTTCATCGAG  
AAGGAGGAGATCAA-----GAAGTTCCTTCAGTT-TTTCTCCTCTCGTG-----  
CCAGAACTGACCGAAGCTGAGATCCAGATTTTTATTGCAGCCGGAGACAAGGACAGCGATGGCAAAATTGGGATAACT

>Callorhinchus\_milii\_PARV\_thymic\_like\_NW\_006890324\_-\_LOC103189414

CGATGTGGCTGCTGCTTTAGCCCAAGTGAAG-----  
-----CCGCAGACTCCTTCAG---CTTCAAGCAGTTCTGT-----  
GCAACGTCCGGTTTGGCGAAGAAATCTTCCGATACAGTCAACAAATCTTTAACATCATTGACGAAGATGGCAGTGTTACATCGAG  
GCCAAGGAGCTCAA-----GTTCTTCCTTCAGAA-TTCTCCTCCGACG-----  
CCAGGGAGCTGGGCGACTCCGAGATCAAGACTGTCTCTCGCCATGGGCATGAGCGACGATGGGAAAATGAATGCCACC

>Paramormyrops\_kingsleyae\_PARV\_beta\_like\_NW\_019713787\_-\_LOC111856009\_CDS

-----TCATCCAATCATTCGGC--ACGCATGGAGTCCTGGGTGTTGGC-  
AAGCAGGCAGGCCTGTCTAACAGGTCATGCGCAGATGGACGGAGTGTCTCCTCAGTGCTGGAGCAGGGCTGCAGTGCTTCACCCAG  
GCGGAGGAACTTAAGTGCAGGCTTTTTCTGCAGAG-CTTCTCGTCTGGGG-----  
CCAGAAAGCTCACTGAGGCTGATACCAAAGATCTTCTCCGACTGGGGACCAAGACGGTGACAGCAAGATAGGAATGGAA

>Anguilla\_anguilla\_NC\_049202\_-\_LOC118221233\_CDS\_very\_las\_5tht

GGACATCGACCGCATTCCGCGGAGATGAGAA-----  
-----TGCAAGGGAACCTCAA---  
CTACTCAAAGTTCTTTGAATACATGCGGCAATACAAGACCTCAGATCAGCAAGAGGAAGTCATCAAGAAAGCCTTCCAGGTCTTGGA  
CAAAGATGGCAGTGAGTACATCGAGTGAATGAGATCAA-----GTATATCCTGTCCAC-  
CGTCCCGAGCTCAGTGCCATTGTTCCCCTGTCTGATGAGGAGGCGAGGCAGTTATACAGGCGGCTGACGCTGACGGGGATGGGAG  
GATCGATTTCAGA

>Lepisosteus\_NC\_023188\_-\_LOC102691822\_calmoparv\_EF

GGATATCAACCGCATGCCAGAGAAATGAGGC-----  
-----TCCAAGGAACTTTAA---  
CTACAGTAAGTTCTTTGAGTACATGCAACAATTTACGACATCAGAGCAGCAGGAGGAATCTATCAAGAAGGCCTTTAAGATGCTGGA  
CAAAGACAACAGTGGCTACATTGAATGGAATGAGATCAA-----GTACATCCTGTCCAC-  
AGTGCCAGCTCCATGCCCGTATGCCCTGTCTGATGAGGAGGCTGAGGCCATGTACAGGCTGCAGATGTGGATGGCGATGGGAG  
GATTGATTTCAGA

>Paramormyrops\_NW\_019712221\_LOC111846579\_calmodulin\_parv

GGACATCGAGCGCATTCCCAGGGAGATGCGGC-----  
-----TGCAAGGGAACCTCAA---  
CTACAGCTTATTCTTGAGTACATGCGACAGTTCAAGACCTCGGAGGAGAAGGAAGAGATGATCGGGAAGGCCTTCCGCACGCTGGA  
CAAAGATGGCAGCGGCTACATCGAGTGAACGAGATCAA-----GTACATCCTGTCCAC-  
CATTCCAGCTCGGTACCTTGGCGCCGCTGTCTGGACGATGAGGCAGAAAGCATAATGCAGGCCGCAGACGTCGATGGCGATGGCCG  
AATCAACTTCAAG

>Sparus\_aurata\_NC\_044206\_4th\_afterbreak\_pvalef\_calmo

GGATATCGACCACATGCCTCCGGGGATGACAT-----  
-----CACAGGGAATCTTCCA---  
CTACAGCCGGTTTCTTGAGTACATGAGGCAGTTCAAGACCTCCGAGCAGCGAGAGGCCATCAAGAAGGCCTTCGTGATGCTCGA  
CAAAGATGCCAGCGGCTACATAGAGTGAATGAAATCAA-----ATACATTCTGTCAAC-

TGTGCCAACTGCAACCCCATCAGCTCCCCTCTCCGATGAGGAGGTGGAGGCCATGATCCAGGCTGTTGACACTGACGGAGACGGACG  
CATCAGCTATAGA

>Homo\_sapeins\_PARV\_NC\_000017\_-\_PVALEF\_CDS

GGACATTGAGCTGCTGCCACAGACATGAGAC-----  
-----ACCACGGGTCCTTCAA---

CTACCTCAAGTTCTTCAAGCACATCCGCAAGCTCCACGCCTCGGGCCAGCTGGACGACGCCATCCACACGGCCTTCCAGTCCCTGGA  
CAAGGACAAGAGTGGCTTCATTGAGTGGAACGAGATCAA-----GTACATCCTGTCCAT-  
CATCCCCAGCAGCGGGCCACCACCCCGCTGACAGACGAGGAGGCCGAGGCCATGATCCAGGCGGCAGACACACACGGGGACGGGAG  
GATCAACTACGAA

>Petromyzon\_marinus\_NC\_046071\_LOC116954295

CGCTAATTTGACGCAATTGACGTGGACGACG-----  
-----ACGGCTTCATTTTCGTTTAACGAATACCGGGACTTCTTG-----GAAATGAACGGT-----  
-----GTGGATCAAGACTGCAGCAGTGTGGACACAAACAAAGATGGCAAGATCTCTTTCGAAGAGTTC-----  
TCTGAATTCTACAAGA-----AGGACTCTGAC-----  
AAGCAGAAGGAGAACTGAAGCTGAAAAAGT-----GA

>Petromyzon\_marinus\_NC\_046071\_LOC116954385

CGCTAATTTGACGCAATTGACGTGGACGACG-----  
-----ACGGCTTCATTTTCGTTTAACGAATACCGGGACTTCTTG-----GAAATGAACGGT-----  
-----GTGGATCAAGACTGCAGCAGTGTGGACACAAACAAAGATGGCAAGATCTCTTTCGAAGAGTTC-----  
TCTGAATTCTACAAGA-----AGGACTCTGAC-----  
AAGCAGAAGGAGAAGCTGAAGCTGAAAAAGT-----GA

>Petromyzon\_marinus\_NC\_046071\_LOC116954337

CGCTAATTTGACGCAATTGACGTGGACGATG-----  
-----ACGGCTTCATTTTCGTTTAACGAATACCGGGACTTCTTG-----GAAATGAACGGT-----  
-----GTGGATCAAGACTGCAGCAGTGTGGACACAAACAAAGATGGCAAGATCTCTTTCGAAGAGTTC-----  
TCTGAATTCTACAAGA-----AGGACTCTGAC-----  
AAGCAGAAGGAGAAGCTGAAGCTGAAAAAGT-----GA

>Petromyzon\_marinus\_NC\_046071\_LOC116954369

CGCTAATTTGACGCAATTGACGTGGACGATG-----  
-----ACGGCTTCATTTTCGTTTAACGAATACCGGGACTTCTTG-----GAAATGAACGGT-----  
-----GTGGATCAAGACTGCAGCAGTGTGGACACAAACAAAGATGGCAAGATCTCTTTCGAAGAGTTC-----  
TCTGATTTCTACAAGA-----AGGACTCTGAC-----  
AAGCAGAAGGAGAAGCTGAAGCTGAAAAAGT-----GA

>Petromyzon\_marinus\_NC\_046071\_LOC116954311

CGCTAATTTGACGCAATTGACGTGGACGACG-----  
-----ACGGCTTCATTTTCGTTTAACGACTACCGGGACTTCTTG-----GAAATGAACGGT-----  
-----GTGGATCAAGACTGCAGCAGTGTGGACACAAACAAAGATGGCAAGATCTCTTTCGAAGAGTTC-----  
TCTGATTTCTACAAGA-----AGGACTCTGAC-----  
AAGCAGAAGGAGAAGCTGAAGCTGAAAAAGT-----GA

>Petromyzon\_marinus\_NC\_046071\_LOC116954353

CGCCATTTTCGACGCAATTGACTTGGACAACG-----  
-----ACGGCTTCATTTTCGTTTAACGACTACCAGGACTTCTTG-----GAAATGAACGGT-----  
-----GTTGATCAAGACTGCAGCAGTGTGGACACAAACAAAGATGGCAAGATCTCTTTCGAAGAGTTC-----

TCTGATTCTACAAGA-----AGGACTCTGAC-----  
AAGCAGAAGGAGAAGCTGAAGCTGAAAAAGT-----GA
